# Remote working in mental health services: a rapid umbrella review of pre-COVID-19 literature

Authors: Phoebe Barnett<sup>ab</sup>, Lucy Goulding<sup>c</sup>, Cecilia Casetta<sup>d</sup>, Harriet Jordan<sup>d</sup>, Luke Sheridan-Rains<sup>a</sup>, Thomas Steare<sup>a</sup>, Julie Williams<sup>c</sup>, Lisa Wood<sup>f</sup>, Fiona Gaughran<sup>dg</sup> & Sonia Johnson<sup>ah</sup>

*Note. Fiona Gaughran & Sonia Johnson are joint last authors.*

<sup>a</sup> NIHR Mental Health Policy Research Unit, Division of Psychiatry, University College London, London, UK

<sup>b</sup> Centre for Outcomes Research and Effectiveness, Division of Psychology and Language Sciences, University College London, London, UK

<sup>c</sup> King's Improvement Science, Centre for Implementation Science, King's College London, UK

<sup>d</sup> NIHR Applied Research Collaboration, Kings College London, UK

<sup>e</sup> Centre for Implementation Science, Health Service and Population Research Department, Institute of Psychiatry, Psychology and Neuroscience, Kings College London, London, UK

<sup>f</sup> Division of Psychiatry, University College London, London, UK

<sup>g</sup> Institute of Psychiatry, Psychology and Neuroscience, Kings College London, and South London and Maudsley NHS trust

<sup>h</sup> Camden and Islington NHS Foundation Trust, London, UK

**Corresponding author: Phoebe Barnett**

phoebe.barnett@ucl.ac.uk

**Declaration of Interest:** None

## **Funding Statement:**

**Policy Research Unit:** This paper presents independent research commissioned and funded by the National Institute for Health Research (NIHR) Policy Research Programme, conducted by the NIHR Policy Research Unit (PRU) in Mental Health. The views expressed are those of the authors and not necessarily those of the NIHR, the Department of Health and Social Care or its arm's length bodies, or other government departments.

**Applied Research Collaboration:** This study is supported by the National Institute for Health Research (NIHR) Applied Research Collaboration South London (NIHR ARC South London) at King's College Hospital NHS Foundation Trust. The views expressed are those of the author(s) and not necessarily those of the NIHR or the Department of Health and Social Care.

LG is funded by King's Improvement Science, which is part of the NIHR ARC South London and comprises a specialist team of improvement scientists and senior researchers based at King's College London. King's Improvement Science is funded by King's Health Partners (Guy's and St Thomas' NHS Foundation Trust, King's College Hospital NHS Foundation Trust, King's College London and South London and Maudsley NHS Foundation Trust), Guy's and St Thomas' Charity, and the Maudsley Charity. JW is funded by the Maudsley Charity. FG is in part supported by the National Institute for Health Research's (NIHR) Biomedical Research Centre at South London and Maudsley NHS Foundation Trust and King's College London, the Maudsley Charity and the National Institute for Health Research (NIHR) Applied Research Collaboration South London (NIHR ARC South London) at King's College Hospital NHS Foundation Trust.

## Abstract

**Background:** Tele-mental health care has been rapidly adopted to maintain services during the pandemic, and there is now substantial interest in its future role. Service planning and policy making for recovery from the pandemic and beyond should draw not only on COVID-19 experiences, but also on the substantial research evidence accumulated prior to this.

**Aims:** to conduct an umbrella review of systematic reviews of research literature and evidence-based guidance on remote working in mental health, including both qualitative and quantitative literature.

**Method:** Three databases were searched between January 2010 and August 2020 for systematic reviews meeting pre-defined criteria. Reviews retrieved were independently screened and those meeting inclusion criteria were synthesised and assessed for risk of bias. Narrative synthesis was used to report findings

**Results:** Nineteen systematic reviews met inclusion criteria. Fifteen examined clinical effectiveness, eight reported on aspects of tele-mental health implementation, ten reported on acceptability to service users and clinicians, two on cost-effectiveness and one on guidance. Most reviews were assessed as low quality. Findings suggested that video-based communication could be as effective and acceptable as face-face formats, at least in the short-term. Evidence was lacking on extent of digital exclusion and how it can be overcome, or on significant context such as children and young people and inpatient settings.

**Conclusions:** This umbrella review suggests that tele-mental health has potential to be an effective and acceptable form of service delivery. However, we found limited evidence on impacts of large-scale implementation across catchment areas. Combining previous evidence and COVID-19 experiences may allow realistic planning for future tele-mental health implementation.

## Introduction

Mental health care and treatment utilising remote technologies such as video or phone (tele-mental health) has become an important tool in recent months, taking a central role internationally in maintaining mental health services during the COVID-19 pandemic (1). Policy makers and mental health professionals, along with mental health service users now express interest in continuing some use of these technologies long-term, even in the absence of pandemic-related social distancing requirements (1-3). Potential benefits of remote technologies extend beyond adaptation to government social distancing guidelines, allowing the efficiency and flexibility of mental health services to be maximised. The mobilisation of tele-mental health during the pandemic has happened largely ad-hoc, achieving remarkably rapid but highly variable implementation. This emergency response has largely occurred without systematic reference to previous literature. In order to plan effective and acceptable deployment of tele-mental health beyond the pandemic, it is crucial that we now take stock of all relevant evidence regarding potential impacts, challenges and outcomes of widespread remote technology utilisation and identify key mechanisms for its acceptable integration into routine care, (4).

Tele-mental health has a number of potential benefits that make it of significant interest to service providers not only during the pandemic, but also longer-term: For service users across a range of populations, settings and conditions (5), potential benefits include convenience and improved accessibility, particularly where issues such as physical mobility difficulties, anxiety, or paranoia impede face-to-face contacts (1). Potential advantages for staff include reduced environmental impact, greater convenience and opportunities for home working and ease of effective communication within and between mental health teams (2). Although some have argued that problems with building of rapport (6), and privacy or safety concerns may hinder implementation of remote care, service users have been found to report such apprehensions less than clinicians (7). Several studies have also suggested that tele-mental health may be more cost effective than face-to-face delivery. (7)

Despite potential benefits and efficiencies, and a substantial body of relevant research, implementation of remote working remained very limited in most countries prior to the pandemic, and substantial implementation barriers have been observed (8), along with potential for inequalities to be exacerbated. Digital exclusion is an important concern regarding service users without the necessary skills, equipment and monetary resources to access online treatment, with this most marked in more marginalised groups such as people from BAME and low-SES backgrounds, and loss of privacy and deterioration in therapeutic relationships are further risks (1, 9-11). Staff participation is also impeded by technological and environmental difficulties, and they express reservations regarding quality of assessments, deterioration of therapeutic relationships, and limitations in the extent to which physical as well as mental health is attended to (8, 10, 11).

Thus, potential benefits and disadvantages of tele-mental health are finely balanced. Risks of longer-term roll-out of remote working without close attention to intended and unintended consequences include digital exclusion of some of those already most disadvantaged and decline in quality of care and potentially of outcomes. One source with potential to inform policy makers and service planners in their future tele-mental health strategies is the substantial body of research studies published before the pandemic. We have therefore aimed to provide a rapid summary of the existing literature on the effectiveness, cost-effectiveness, barriers and facilitators for implementation, acceptability and reach of remote interventions for assessment and treatment of mental health problems. Our objective was to identify, appraise and synthesise systematic reviews of literature and guidance on remote working in mental health, including qualitative and quantitative outcomes using “umbrella review” or “review of reviews” methodology. Umbrella reviews are useful when the evidence base is broad, and are useful in summarising a broad evidence base in order to inform policy (12). It is hoped that the results may help to illuminate the benefits and remaining challenges when implementing telehealth technologies during the remainder of the pandemic and in the perhaps permanently changed reality that follows.

## Method

A rapid umbrella review was conducted, guided by the World Health Organisation (WHO) practical guide for *Rapid Reviews to Strengthen Health Policy and Systems* (13) and adhering to Preferred Reporting Items for Systematic reviews and Meta-Analyses (PRISMA) guidelines (14) and umbrella review guidance (15). In line with agreed rapid review methodology, our aim in this review was to provide a timely but robust answer to the research question, through accelerating some aspects of the systematic review process while maintaining transparency and protocol-driven decision making throughout (13). The protocol was prospectively registered on PROSPERO (CRD42020208085).

### Search strategy and selection criteria

The search strategy implemented a combination of keyword and subject heading searches across PsycINFO (01/01/2010-26/08/2020), PubMed (01/01/2010-26/08/2020) and the Cochrane Database of Systematic Reviews (01/01/2010-26/08/2020). The full search strategy is available in Appendix 1. We included systematic reviews meeting the following criteria:

**Population:** Staff working within the field of mental health, people receiving mental health care or with mental health diagnoses, family members or carers of people receiving mental health care. We included people with dementia, neurodevelopmental disorders and addiction, but excluded people with primary sleep disorders unless combined with another included mental health problem.

**Interventions:** Any form of spoken or written communication carried out between mental health professionals and patients/service users/family members /carers or between mental health professionals using either the internet or the telephone. We excluded reviews of digital interventions where the primary aim of the technology was not to facilitate direct therapeutic contact with a mental health professional: thus, for example we excluded apps and websites delivering assessment or treatment in a digital format.

**Outcomes:** Reviews reporting at least one of: implementation outcomes (outcomes relating to the process of care, adherence to intended models, uptake and coverage and barriers and facilitators to implementation), acceptability outcomes (including staff and service user satisfaction, and experiences of the therapeutic relationship and communication), clinical effectiveness, cost effectiveness, or evidence-based guidance for remote working were included. Qualitative and quantitative data were included.

**Design:** Systematic reviews with or without meta-analyses, realist reviews, and qualitative meta-syntheses were included. We considered reviews to be of sufficient quality for inclusion if they searched at least 3 databases, and in line with recommendations for the conduct of systematic reviews for quantitative data (14), quantitative reviews were also required to include appraisal of the quality of included studies.

Due to the rapid nature of the review, we limited our search to reviews published since January 2010 and those available in English language. This was a pragmatic decision taken since studies published prior to 2010 would still be picked up within systematic reviews.

Three reviewers (PB, LG, CC) double screened 10% of titles and abstracts, with disagreements being discussed until consensus was reached. The remaining titles were then independently screened, with studies not meeting inclusion criteria excluded. Full-text articles were subsequently reviewed by five reviewers (PB, TS, LG, CC, LW). A selection of full-texts were double checked to ensure consistency, and any reviews which did not facilitate a straightforward inclusion or exclusion decision were discussed with the wider review group. The search and screening process is depicted in Figure 1.

Figure 1: Prisma Diagram.

### Data extraction

Seven reviewers (LG, CC, PB, TS, LSR, JW, HIJ) extracted data from included reviews using an Excel-based form. 10% of extractions were double checked by a second reviewer, and inconsistencies

discussed and corrected. Data extracted included: citation details, objectives, type of review, participant details (including gender, ethnicity, age, and mental health diagnosis and staff details where relevant), type(s) of tele-mental health intervention reviewed, setting and context (mental health service, community or inpatient/residential, primary mental health care service), number of databases sourced and searched, date range of database searching, publication date range of studies included in the review informing each outcome of interest, number of included studies, types of studies and country of origin of studies included, instrument used to appraise the primary studies and the rating of their quality, reported clinical, cost-effectiveness and implementation outcomes, method of synthesis/analysis employed to synthesize the evidence, conclusions of the review authors.

### **Quality assessment**

Quality of each included systematic review was assessed using the Assessment of Multiple Systematic Reviews (AMSTAR2) checklist (16). The checklist was used to give each review an overall rating of quality ranging from high to critically low based on review design weaknesses (16). Study quality was assessed alongside data extraction, and quality ratings are available in Table 1.

### **Data synthesis**

Heterogeneity in study populations and interventions included in the review, as well as broad inclusion criteria for review study design (e.g. qualitative, quantitative), prevented quantitative pooling of syntheses. As a result, we conducted a narrative synthesis of all interventions and outcomes (17). This allowed a more in-depth consideration of all outcome measures and variations in remote intervention delivery. We grouped reviews by the included population (mental health diagnosis), and further considered the variation in interventions on offer within these subgroups. This was done for each outcome of interest. Most reviews provided a synthesis of multiple intervention types, or failed to adequately differentiate them, making a more thorough comparison across formats impossible.

## **Results**

The search returned 1,086 reviews, from which 292 potentially relevant full-text articles were identified. Following full text checks, 19 reviews met the inclusion criteria (See Figure 1), reporting on 239 individual studies and 20 guidance documents. Fifteen of the included reviews examined the clinical effectiveness of tele-mental health compared to (a) face-to-face interventions and assessments (K=4), (b) Treatment as usual (K=2) or (c) a variety of comparators including face-to-face, telephone and treatment as usual (K=9). Eight reviews reported on implementation (broadly defined), including process variable, fidelity and uptake of interventions, and ten reviews reported outcomes relating to acceptability, including satisfaction of both service users and clinicians. One review focused specifically on the difference in therapeutic alliance between treatment modalities. Two reviews reported on cost-effectiveness, one on this topic only and the other in combination with clinical effectiveness. One review synthesised international guidance on the conduct of videoconferencing based mental health treatments. Full details of included reviews are available in Table 1. Some primary studies were included in more than one review: 26 studies appeared in two reviews and 27 studies appeared in 3 or more. The remaining 186 studies appeared in only one review. Double-counting of primary studies due to inclusion in multiple reviews contributing to the same outcome was only found for clinical effectiveness outcomes. However, conclusions were similar across reviews, even though no review had all the same studies contributing to each synthesis. Further details of study overlap can be found in Appendix 2.

### **TABLE 1 STUDY CHARACTERISTICS**

#### **Quality of included reviews**

Most reviews elicited low confidence on quality appraisal due to multiple study design weaknesses. The most common weaknesses included a lack of explicit statements that a protocol was developed prior to commencement of the review (Explicit statements were reported in two reviews (18, 19)),

lack of duplicate study selection (duplicate selection was reported in five reviews (19-23)), no report of excluded studies and reasons for exclusion (exclusions were reported in two reviews, (19, 21)), and no report of sources of funding (sources of funding were reported in three reviews, (21, 24, 25)). Meta-analysis was not performed in the majority of reviews, usually due to heterogeneous data or aims centring around more narrative conclusions such as satisfaction (K=12), but in those that included meta-analysis (19, 21, 25-28), all except two (21, 27) assessed publication bias. The potential impact of risk of bias was only assessed in two reviews performing meta-analysis (21, 27), but all reviews performing meta-analysis used appropriate statistical methods for combining results. The reviews eliciting higher confidence (moderate) were the two Cochrane reviews (21, 28). Quality ratings of reviews are available in Table 1, and full details of quality assessments are available in Appendix 3

### **Clinical outcomes**

Clinical outcomes were reported in 15 reviews (18-21, 24-34). Across all patient populations, including patients with anxiety (K=3), PTSD (K=2), depression (K=4) (including in ethnic minorities (K=1)(31) and older adults (K=1)(18)), substance use disorders (K=1) and multiple disorders (K=4), videoconferencing interventions were reported to result in significant reductions in symptom severity, with outcomes comparable to face-to-face controls where these were included. Telephone based interventions tended to report similar significant reductions in symptom severity. However, the review of telephone interventions with older adults with depression (18) reported more mixed findings: reductions were reported in emergency room and hospital visits in one study, and in depression in another, but a third study suggested that telephone interventions did not add to benefit from a web-only intervention. n. Follow-up treatment gains were less widely reported and conclusions were mixed across reviews. While maintenance of improvements was found at follow up assessments in two reviews regarding video-based tele-therapy (27, 34) and another regarding telephone-based therapy (24), two other reviews reported that videoconference interventions may show less longevity in maintenance of effects than face-to-face interventions (26, 31). A final review of mixed modality remote interventions suggested that while inferior to face to face formats at shorter term follow up, remote interventions may be more beneficial than face-to-face at longer follow-ups (36 months) (18). Further details on clinical outcomes are available in Table 2.

TABLE 2: Clinical effectiveness outcomes

### **Implementation outcomes**

Implementation outcomes were reported in 8 reviews (20, 22, 25, 26, 31, 33-35) Relevant outcomes included assessment comparability (K=2), fidelity to intervention and competence of therapists (K=1) (34), patient adherence to intervention (K=3) (20, 26, 31), patient attendance (K=4) (31, 33-35), safety (K=2) (26, 34), and technical difficulties (K=3) (26, 34, 35).

#### **Assessment comparability**

Limited evidence from one review suggests that video-conferencing can be used to provide assessment which is consistent with face-to-face assessment, with a correlation coefficient of 0.73 (95% CI: 0.63, 0.83) between conclusions of videoconference assessments and face to face assessments (25). A review of telephone assessments found that properly performed studies on telephone assessments were lacking, though telephone assessment for research purposes was suggested to have some potential use (22).

#### **Fidelity and competence of therapists**

One review (34) found that three studies of interventions for PTSD in veterans had been conducted that found fidelity and competence comparable to face-to-face interventions.



### **Patient adherence to intervention**

Of three reviews (20, 26, 31) examining patients' adherence to remote interventions, the general consensus was that comprehension of tasks and completion rates are high during both telephone and video-based CBT. However, one review found mixed findings, with one of the two studies it included reporting better adherence in the face-to-face intervention group for patients with PTSD, but equivalent adherence in remote and face-to-face conditions was found in another study of patients with depression. (20)

### **Patient attendance**

Increased uptake and access to care compared to before use of remote technology was reported in reviews of depression treatment in older adults (18), PTSD treatment in veterans (34), and substance use disorder treatment (33). Drop out tended to be comparable to face-to-face interventions (33, 34). However, one review included a study reporting difficulty reaching ethnic minority patients with depression (31)

### **Safety**

Patient safety when using remote interventions was reported in reviews of PTSD populations only. Two reviews agreed that safety was acceptable, with one reporting that generally with correct steps taken, safety could be managed in remote settings (34), and another reporting that client safety was deemed satisfactory (however no further detail was provided on this) (26).

### **Technical difficulties**

Three reviews reported technical difficulties, none of which were identified as severe barriers to remote technology implementation. A review of older adults with depression found that four studies reported mistrust in technology (35), while more logistical challenges such as low image resolution and connectivity problems were reported in a review of video-based PTSD intervention for veterans (34). Another review reported findings from one included study that participants preferred mobile apps to supplement remotely delivered support (26). Further details on implementation outcomes are available in Table 3.

TABLE 3: Implementation outcomes

### **Acceptability outcomes**

Acceptability outcomes were reported in 10 reviews (18, 20, 21, 26, 27, 31-35). Relevant outcomes included clinician satisfaction (K=5) (18, 20, 21, 32, 34), therapeutic alliance (K=6) (21, 26, 27, 33-35), patient satisfaction (K=7) (20, 21, 31-35) and convenience (K=3) (21, 33, 35).

### **Clinician satisfaction**

Overall, clinicians tend to report a preference for face-to-face interventions for both assessment and treatment (20, 32). However, some reviews have reported that clinicians find video-based therapies acceptable (32, 34). One review of remote interventions for carers of people with dementia found that counsellors felt they might need more support via debriefing following remote counselling sessions, and they also reported problems when reactions of carers could not be ascertained via the remote technology, and feelings of helplessness due to the impersonal nature of remote technology (21). Healthcare providers using remote interventions in older adults noticed practical benefits of telehealth (18).

### **Therapeutic alliance**

Overall, good therapeutic alliance was reported as comparable to face-to-face interventions. However, some patient groups were found to feel more comfortable talking to therapists face-to-face, if possible, such as female older adults (35) or veterans (34). Meta-analysis was conducted in one review, which found that while standardized mean differences in alliance ratings were not significantly different, the lower limit of the 95% CI fell outside the pre-specified limit of non-

inferiority, indicating that videoconference interventions may be inferior to face to face treatment, likely the result of therapist rated (but not patient rated) alliance scores being lower in the videoconference groups (27).

### **Patient satisfaction**

High patient satisfaction was generally reported across seven reviews and patients tended to find remote interventions as satisfactory as face-to-face alternatives. This was true in substance use disorder (33), depression (20, 31, 32, 35), PTSD (34), older adult (35), ethnic minority (31), and carers of dementia patient populations (21), although Hassan et al. (32) reported a minority of studies indicating preference for face-to-face interventions. A review in older people noted that initial scepticism among both service users and providers tended to dissipate following positive experiences of video-conferencing, and that, with appropriate support and access to technology, even some who had not previously used computers reported positive experiences of video-calls (35). Accepting the need for treatment to be in tele-therapy form instead of face-to-face was reported as important in a study of veterans with PTSD (34)

### **Convenience**

Patients reported the benefits of added convenience of therapy sessions at home via remote interventions for both depression (21, 35) and substance use disorders (33). Further details on acceptability outcomes are available in Table 4.

TABLE 4: Acceptability outcomes

### **Cost effectiveness**

Two reviews presented conclusions regarding the economic impact of telepsychiatry (32, 36). One review concluded that tele-psychiatry can be cost effective, compared to face-to-face interventions, particularly in rural areas where the number of consultations required before telepsychiatry becomes more cost effective (combatting initial equipment costs) is lower (32). The second review, whose main focus was on the cost effectiveness of telepsychiatry, reported that 60% (K=15) of included studies reported that telepsychiatry programmes were less expensive than standard in person care, due to savings such as travel time and reduced need for patients and their families to take time off work. However, eight studies concluded that telepsychiatry programmes were more expensive, particularly due to videoconferencing equipment costs. A final study included in the review found no difference in costs. The review also found a large range in reported costs, with, for example longer term delivery of telepsychiatry for Veterans ranging from \$930 (2019 US dollars) to \$2116 per patient. Cost effectiveness analyses were found in three included studies (37-39), which seemed to suggest that telepsychiatry was less cost effective. The review concluded that variation was due to large disparity in reporting of costs, for example whether personnel costs or initial equipment costs were included, and that there remains a need for future efforts to determine the cost effectiveness of different forms of telepsychiatry particularly for different disorders and applications of remote technology (e.g. consultation vs therapy). In addition, Dorstyn and colleagues (31) looked at health service utilisation which can impact cost effectiveness. They found that rates of antidepressant and health service utilisation were similar in the 3 months following both telephone and web-based counselling.

### **Guidelines**

Only one review (23) of guidelines for remote working was found that met the inclusion criteria. This review comprehensively summarised the guidance published to date, including guidance on decisions about the appropriateness of e-mental health, ensuring competence of mental health professionals, legal and regulatory issues, confidentiality, professional boundaries, and crisis intervention. Recommendations from 19 guidelines were characterized as either firm (50% or more recommending) or tentative (fewer than 50% recommending). The review identified as firm recommendations ensuring that remote interventions were appropriate for the needs of individual patients and within the boundaries of therapist competence, laws and regulations; maintaining confidentiality and seeking



informed consent, including for specific aspects of remote appointments such as data security; and ensuring geographically accessible in-person clinical support is available in case of crisis or emergency. Guidelines suggested a higher risk of harm for people with cognitive impairments and psychotic disorders, but did not provide concrete recommendations as to how to adapt to these populations. Furthermore, a minority of guidelines discussed remote technology in young people, with the main message being the importance of checking consent with both the patient and parent. A full summary of recommendations from the review can be found in Appendix 4.

## Discussion

Our umbrella review retrieved a variety of recent relevant systematic reviews, on which future planning of tele-mental health implementation can usefully draw. Across the 19 reviews included in this umbrella review, results suggest that remote forms of assessment and intervention can produce at least moderate decreases in symptom severity for people suffering from a variety of mental health conditions. Arguments are strongest for videoconferencing interventions, with multiple reviews concluding that outcomes appear comparable to face-to-face interventions in the short term. However, at present, conclusions regarding longer term results remain uncertain: while some reviews have reported maintenance of positive effects at short term and long-term follow-ups for both videoconference and telephone-based interventions, other reviews have suggested that effects are less long-lasting than face to face intervention and the amount of evidence on which to base this assessment is limited

Reviews also suggest that remote interventions are satisfactory to service users participating in studies, who tended to report being as satisfied as with face-to-face interventions. This is promising in relation to adaptations during the COVID-19 crisis and for the future, but the reviews tend to relate to small-scale and carefully planned implementations of tele-mental health with volunteer participants, rather than to large-scale emergency implementations as in the current crisis. Clinician satisfaction varied more, with reviews tending to conclude that while remote interventions may be acceptable, face-to-face intervention is usually preferable. This may be related to reports in some reviews that clinician-ratings of therapeutic alliance are poorer with tele-mental health (27, 40). Despite this, patients tend to feel that alliance is on-par with face-to-face interventions (27, 33, 34). There is some suggestion that training and more experience with video and telephone-based technology for intervention delivery may alleviate this concern in therapists (40), although staff reports following increased uptake in the COVID crisis seem to suggest continued concerns about rapport (2).

Evidence yielded by reviews on the important questions of whether assessments appeared accurate and comprehensive and whether treatment was delivered as intended was limited. Two reviews examined comparability of remote versus face-to-face assessment, with one review finding good correlation between assessments, and another finding that there was insufficient high-quality evidence published thus far to draw accurate and meaningful conclusions (22, 25). Regarding fidelity, we found one review that reported good therapist fidelity and competence in remotely delivered interventions in the context of service delivery for veterans with PTSD (34): thus, there appears to be a gap in the evidence as reported in systematic reviews as to whether high fidelity and quality is achieved with tele-mental health interventions. High quality standardised training rooted in evidence will be important to ensuring high quality and overcoming self-doubt among clinicians in delivering remote interventions (23, 40, 41).

A crucial question regarding the rapid adoption of remote technologies during the pandemic has been how far service users may drop out of or be excluded from care as a result. A minority of the reviews included relevant data, most of it relatively reassuring. Reviews reported that remote interventions were convenient, and those examining uptake reported an increase. Where examined, retention was also comparable to face-to-face treatment (33, 34). Reports of technological difficulties were reassuringly few across reviews, although this may be more easily achieved with the well-planned,

smaller-scale implementations of tele-mental health that characterise research studies than with larger scale implementation. However, one aspect of remote delivery in which reviews did not generally report is the risk of complete digital exclusion for those patients who may not have the skills or resources to engage with remote therapy or assessments (1, 2). Implementation of tele-mental health across service systems is only likely to be beneficial if there are clear plans for preventing patients with limited access to technology from being at a disadvantage (42, 43), whether by supporting them to engage with remote care or ensuring that equivalent care is available face-to-face.

Digital exclusion may result in the exacerbation of existing inequalities where already disadvantaged groups, such as older adults, people with sensory or cognitive impairment or members of some Black Asian and Minority Ethnic Groups, are at greater risk of exclusion (1, 44, 45). Some included reviews have examined this (18, 35). A single review by Dorstyn and colleagues (31) reported that members of predominantly North American ethnic minority communities with depression benefited from tele-counselling. To consolidate this further, a broader evidence base is thus urgently required to evaluate the risk of exacerbating ethnic inequalities in mental health care access through tele-mental health adoption. Furthermore, many have argued that the shift to remote working may exclude older adults (35, 44). With findings from one review (18) suggesting videoconferencing interventions can be comparable to face-to-face, and another (35) finding high levels of patient satisfaction, therapeutic alliance, attendance and convenience, this review suggests effective remote intervention delivery may be feasible for older adults. This is encouraging as staying at home and avoiding infection during the pandemic is especially desirable for older adults. No reviews were found regarding other sub-groups of potential concern, such as people with sensory or cognitive impairments, children and adolescents and their families or people with comorbid mental and physical health conditions. We also did not find substantial evidence on settings of particular interest, such as mental health inpatient services (including the use of tele-mental health in compulsory detention processes) and crisis services.

### **Limitations**

The findings of this umbrella review should be considered alongside a number of limitations. Firstly, umbrella reviews by their nature aim to present an overview of findings from systematic reviews (46), making conclusions reliant on the quality and reporting accuracy of included reviews and necessarily resulting in some loss of nuance when findings are pooled. Although we included only reviews considered to be systematic (defined here as searching at least three databases, and conducting a quality assessment when synthesising quantitative data), it was apparent from our quality assessment that the majority of reviews lacked several attributes characteristic of a high-quality review with robust conclusions, for example pre-specified protocols and duplicate study selection. However, our aim was to gain a rapid overview, relevant especially to current and future rapid implementation of tele-mental health, of the extent of supporting evidence to be drawn from previous literature regarding tele-mental health: the umbrella review provides a useful route to achieving this. Inclusion of systematic reviews focused on methods other than randomised controlled trials and on guidance further increases the methodological variability of included reviews and studies, but is a choice made to maximise retrieval of material from which real-world important lessons can be learnt regarding feasibility, acceptability and implementation barriers and facilitators (47).

This review also aimed to summarise outcomes relating to cost-effectiveness of remote delivery. We found only two reviews which summarised this outcome and only one which did this comprehensively. Given conclusions that further work should be done to establish the cost effectiveness of different forms of remote working, for different patient groups, there is a significant gap in the literature given that efficiency is one of the arguments made to support remote interventions (48).

Finally, this review aimed to summarise the literature published prior to the COVID-19 pandemic to identify evidence relevant both to the current context and the recovery from the pandemic. However,

the current pandemic has given rise to a much more extensive switch to tele-mental health than previously, meaning that not all conclusions may be generalised to “the new normal”. In particular, the evidence retrieved in this review tends not to relate to implementation of tele-mental health across whole catchment areas and does not yield much evidence relevant to currently highly salient issues such as risks of digital exclusion or exacerbation of mental health inequalities and economic disadvantage which may well be exacerbated as a result of COVID-19 (1, 2). Conclusions of this review should be supplemented with further scrutiny of adoption of remote working within the context of these societal changes.

## Conclusion

Research across a range of mental health conditions suggests that tele-mental health is potentially an effective, feasible and acceptable tool for providing mental health treatment, at least when interventions are relatively well-designed and well-planned, as has tended to be the case in research studies. Comparability in terms of symptom improvement and satisfaction to face-to-face methods suggests the move to tele-mental health to sustain mental health services during the pandemic has probably been a reasonable one, although the context of this emergency implementation has been very different from most research studies. Further research should seek to build on existing evidence in establishing the longer-term effectiveness and cost-effectiveness of tele-mental health in a range of groups and settings, for example including children and young people and inpatient acute services and focusing on issues of inclusion and reach. A further question on which further evidence would be highly desirable is the extent to which digital exclusion can be remedied, including examination of interventions designed to include those with limited previous digital resources or skills. Future planning for tele-mental health implementation should draw both on previous research evidence, often acquired in relatively small-scale studies, and on COVID-19 learning from experiences of trying to engage large service user populations and most of the mental health workforce with remote technology delivery.

## References

1. Sheridan-Rains L, Johnson S, Barnett P, Steare T, Needle JJ, Carr S, et al. Early impacts of the COVID-19 pandemic on mental health care and on people with mental health conditions: framework synthesis of international experiences and responses. *Social psychiatry and psychiatric epidemiology*. 2020:1-12.
2. Johnson S, Dalton-Locke C, San Juan NV, Foye U, Oram S, Papamichail A, et al. Impact on mental health care and on mental health service users of the COVID-19 pandemic: a mixed methods survey of UK mental health care staff. *Social psychiatry and psychiatric epidemiology*. 2020:1-13.
3. Daigle P, Rudnick A. Shifting to Remotely Delivered Mental Health Care: Quality Improvement in the COVID-19 Pandemic. *Psychiatry International*. 2020;1(1):31-5.
4. Moreno C, Wykes T, Galderisi S, Nordentoft M, Crossley N, Jones N, et al. How mental health care should change as a consequence of the COVID-19 pandemic. *The Lancet Psychiatry*. 2020.
5. Hilty DM, Ferrer DC, Parish MB, Johnston B, Callahan EJ, Yellowlees PM. The effectiveness of telemental health: a 2013 review. *Telemedicine and e-Health*. 2013;19(6):444-54.
6. Yellowlees P, Richard Chan S, Burke Parish M. The hybrid doctor–patient relationship in the age of technology–Telepsychiatry consultations and the use of virtual space. *International Review of Psychiatry*. 2015;27(6):476-89.
7. Hubley S, Lynch SB, Schneck C, Thomas M, Shore J. Review of key telepsychiatry outcomes. *World Journal of Psychiatry*. 2016;6(2):269.
8. Aboujaoude E. Telemental health: why the revolution has not arrived. *World Psychiatry*. 2018;17(3):277.
9. Luxton DD, Pruitt LD, Osenbach JE. Best practices for remote psychological assessment via telehealth technologies. *Professional Psychology: Research and Practice*. 2014;45(1):27.

10. Stoll J, Müller JA, Trachsel M. Ethical issues in online psychotherapy: A narrative review. *Frontiers in psychiatry*. 2020;10:993.
11. Tullio V, Perrone G, Bilotta C, Lanzarone A, Argo A. Psychological support and psychotherapy via digital devices in Covid-19 emergency time: Some critical issues. *Medico-Legal Journal*. 2020:0025817220926942.
12. Pieper D, Antoine S-L, Mathes T, Neugebauer EA, Eikermann M. Systematic review finds overlapping reviews were not mentioned in every other overview. *Journal of clinical epidemiology*. 2014;67(4):368-75.
13. Tricco AC, Langlois E, Straus SE, Organization WH. *Rapid reviews to strengthen health policy and systems: a practical guide*: World Health Organization; 2017.
14. Moher D, Liberati A, Tetzlaff J, Altman DG, Group P. Preferred reporting items for systematic reviews and meta-analyses: the PRISMA statement. *PLoS med*. 2009;6(7):e1000097.
15. Fusar-Poli P, Radua J. Ten simple rules for conducting umbrella reviews. *Evidence-based mental health*. 2018;21(3):95-100.
16. Shea BJ, Reeves BC, Wells G, Thuku M, Hamel C, Moran J, et al. AMSTAR 2: a critical appraisal tool for systematic reviews that include randomised or non-randomised studies of healthcare interventions, or both. *bmj*. 2017;358:j4008.
17. Popay J, Roberts H, Sowden A, Petticrew M, Arai L, Rodgers M, et al. *Guidance on the conduct of narrative synthesis in systematic reviews. A product from the ESRC methods programme Version*. 2006;1:b92.
18. Harerimana B, Forchuk C, O'Regan T. The use of technology for mental healthcare delivery among older adults with depressive symptoms: A systematic literature review. *International journal of mental health nursing*. 2019;28(3):657-70.
19. Olthuis JV, Watt MC, Bailey K, Hayden JA, Stewart SH. Therapist-supported Internet cognitive behavioural therapy for anxiety disorders in adults. *Cochrane Database of Systematic Reviews*. 2016(3).
20. García-Lizana F, Muñoz-Mayorga I. What about telepsychiatry? A systematic review. *Primary care companion to the Journal of clinical psychiatry*. 2010;12(2).
21. Lins S, Hayder Beichel D, Rücker G, Motschall E, Antes G, Meyer G, et al. Efficacy and experiences of telephone counselling for informal carers of people with dementia. *Cochrane database of systematic reviews*. 2014(9).
22. Muskens EM, Lucassen P, Groenleer W, Van Weel C, Voshaar RO, Speckens A. Psychiatric diagnosis by telephone: is it an opportunity? *Social psychiatry and psychiatric epidemiology*. 2014;49(10):1677-89.
23. Sansom-Daly UM, Wakefield CE, McGill BC, Wilson HL, Patterson P. Consensus among international ethical guidelines for the provision of videoconferencing-based mental health treatments. *JMIR mental health*. 2016;3(2):e17.
24. Coughtrey AE, Pistrang N. The effectiveness of telephone-delivered psychological therapies for depression and anxiety: a systematic review. *Journal of telemedicine and telecare*. 2018;24(2):65-74.
25. Drago A, Winding T, Antypa N. Videoconferencing in psychiatry, a meta-analysis of assessment and treatment. *European Psychiatry*. 2016;36:29-37.
26. Bolton A, Dorstyn D. Telepsychology for posttraumatic stress disorder: A systematic review. *Journal of telemedicine and telecare*. 2015;21(5):254-67.
27. Norwood C, Moghaddam NG, Malins S, Sabin Farrell R. Working alliance and outcome effectiveness in videoconferencing psychotherapy: A systematic review and noninferiority meta-analysis. *Clinical Psychology & Psychotherapy*. 2018;25(6):797-808.
28. Olthuis JV, Wozney L, Asmundson GJ, Cramm H, Lingley-Pottie P, McGrath PJ. Distance-delivered interventions for PTSD: A systematic review and meta-analysis. *Journal of anxiety disorders*. 2016;44:9-26.
29. Berryhill MB, Culmer N, Williams N, Halli-Tierney A, Betancourt A, Roberts H, et al. Videoconferencing psychotherapy and depression: a systematic review. *Telemedicine and e-Health*. 2019;25(6):435-46.

30. Berryhill MB, Halli-Tierney A, Culmer N, Williams N, Betancourt A, King M, et al. Videoconferencing psychological therapy and anxiety: a systematic review. *Family practice*. 2019;36(1):53-63.
31. Dorstyn DS, Saniotis A, Sobhanian F. A systematic review of telecounseling and its effectiveness in managing depression amongst minority ethnic communities. *Journal of telemedicine and telecare*. 2013;19(6):338-46.
32. Hassan A, Sharif K. Efficacy of Telepsychiatry in Refugee Populations: A Systematic Review of the Evidence. *Cureus*. 2019;11(1).
33. Lin LA, Casteel D, Shigekawa E, Weyrich MS, Roby DH, McMenamin SB. Telemedicine-delivered treatment interventions for substance use disorders: A systematic review. *Journal of substance abuse treatment*. 2019;101:38-49.
34. Turgoose D, Ashwick R, Murphy D. Systematic review of lessons learned from delivering tele-therapy to veterans with post-traumatic stress disorder. *Journal of telemedicine and telecare*. 2018;24(9):575-85.
35. Christensen LF, Moller AM, Hansen JP, Nielsen CT, Gildberg FA. Patients' and providers' experiences with video consultations used in the treatment of older patients with unipolar depression: A systematic review. *Journal of psychiatric and mental health nursing*. 2020;27(3):258-71.
36. Naslund JA, Mitchell LM, Joshi U, Nagda D, Lu C. Economic evaluation and costs of telepsychiatry programmes: A systematic review. *Journal of telemedicine and telecare*. 2020:1357633X20938919.
37. Bounthavong M, Pruitt LD, Smolenski DJ, Gahm GA, Bansal A, Hansen RN. Economic evaluation of home-based telebehavioural health care compared to in-person treatment delivery for depression. *Journal of telemedicine and telecare*. 2018;24(2):84-92.
38. Painter JT, Fortney JC, Austen MA, Pyne JM. Cost-effectiveness of telemedicine-based collaborative care for posttraumatic stress disorder. *Psychiatric Services*. 2017;68(11):1157-63.
39. Pyne JM, Fortney JC, Tripathi SP, Maciejewski ML, Edlund MJ, Williams DK. Cost-effectiveness analysis of a rural telemedicine collaborative care intervention for depression. *Archives of general psychiatry*. 2010;67(8):812-21.
40. Aafjes-van Doorn K, Békés V, Prout TA. Grappling with our therapeutic relationship and professional self-doubt during COVID-19: will we use video therapy again? *Counselling Psychology Quarterly*. 2020:1-12.
41. Association AP. Guidelines for the practice of telepsychology 2013. Available from: <https://www.apa.org/practice/guidelines/telepsychology>.
42. Hoffman L, Wisniewski H, Hays R, Henson P, Vaidyam A, Hendel V, et al. Digital Opportunities for Outcomes in Recovery Services (DOORS): a pragmatic hands-on group approach toward increasing digital health and smartphone competencies, autonomy, relatedness, and alliance for those with serious mental illness. *Journal of Psychiatric Practice*. 2020;26(2):80-8.
43. Torous J, Myrick KJ, Rauseo-Ricupero N, Firth J. Digital mental health and COVID-19: Using technology today to accelerate the curve on access and quality tomorrow. *JMIR mental health*. 2020;7(3):e18848.
44. Richardson SJ, Carroll CB, Close J, Gordon AL, O'Brien J, Quinn TJ, et al. Research with older people in a world with COVID-19: identification of current and future priorities, challenges and opportunities. *Age and ageing*. 2020;49(6):901-6.
45. Primm AB, Vasquez MJ, Mays RA, Sammons-Posey D, McKnight-Eily LR, Presley-Cantrell LR, et al. The role of public health in addressing racial and ethnic disparities in mental health and mental illness. *Preventing chronic disease*. 2010;7(1).
46. Papatheodorou S. Umbrella reviews: what they are and why we need them. *European journal of epidemiology*. 2019;34(6):543-6.
47. Mulder R, Singh AB, Hamilton A, Das P, Outhred T, Morris G, et al. The limitations of using randomised controlled trials as a basis for developing treatment guidelines. *Evidence-based mental health*. 2018;21(1):4-6.
48. Johns B, Baltussen R, Hutubessy R. Programme costs in the economic evaluation of health interventions. *Cost effectiveness and resource allocation*. 2003;1(1):1.



**Table 1: Characteristics of included studies**

| Author, year            | Intervention type (N studies)                                                                                                                                                             | Comparator (N studies)                                                                    | Search dates      | N studies included      | Study design included (N studies)                                                                                                                                     | N patients included (% F) | Diagnoses (N of studies)                                                  | Population age (mean, range) | Ethnicity (N,%)                                                                           | Countries covered (N studies)                                          | Quality appraisal rating (AMSTAR2) |
|-------------------------|-------------------------------------------------------------------------------------------------------------------------------------------------------------------------------------------|-------------------------------------------------------------------------------------------|-------------------|-------------------------|-----------------------------------------------------------------------------------------------------------------------------------------------------------------------|---------------------------|---------------------------------------------------------------------------|------------------------------|-------------------------------------------------------------------------------------------|------------------------------------------------------------------------|------------------------------------|
| <b>Harerimana, 2019</b> | Mobile applications (NR)<br>Smart technologies (NR)<br>Teleconferencing systems (NR)<br>Internet-based therapies (NR)<br>Skype (videoconferencing) calls (NR)                             | Waiting list and/or TAU (NR)<br>No comparator (NR)                                        | 1946 - 27/09/2017 | 9                       | Pilot RCT (2)<br>RCT (2)<br>Programme case analysis (1)<br>Quasi-experimental study (1)<br>Prospective design (1)<br>Cross-sectional survey (1)<br>Case study (1)     | 2032 (NR)                 | Depression or self-reported depressive symptoms (9)                       | NR (> 65 years old)          | NR                                                                                        | USA (5)<br>Australia (1)<br>Canada (1)<br>China (1)<br>Netherlands (1) | Low                                |
| <b>Dorstyn, 2013</b>    | Tele-counselling, i.e. telephone, videophone, computer (NR) and/or<br>Online digital media, i.e. email, audio-only or audio-video communication via the internet (NR)                     | TAU (3)<br>F2F (1)<br>Minimal support/ Waitlist (2)<br>No comparator (2)                  | 1970-2013         | 9 (8 different samples) | RCT (7)<br>Single arm (1)<br>Non-randomized controlled trial (1)                                                                                                      | 498 (66%)                 | Depression or psychiatric comorbidities with depressive symptoms (9)      | 54, NR                       | Hispanic (243, 52%)<br>Latino (139, 30%)<br>Asian (105, 21%)<br>African-American (11, 2%) | USA (6)<br>Canada (1)<br>Australia (1)                                 | Critically Low                     |
| <b>Berryhill, 2019a</b> | Video-based CBT (12)<br>Video-based behavioural activation (5)<br>Video-based acceptance and behavioural therapy (1)<br>Video-based exposure (3)<br>Video-based metacognitive therapy (1) | Face-to-face psychotherapy (K=16)<br>Face-to-face or telephone (K=2)<br>No control (K=15) | 1991-2017         | 33                      | RCT (14)<br>Quasi-experimental (4)<br>Single cohort study - pre-post (9)<br>Case-study (4)<br>Multiple baseline design (1)<br>Single case interrupted time series (1) | NR                        | Depression (9)<br>PTSD (12)<br>Depression with comorbid anxiety/PTSD (12) | NR (mean range 10.3-80.4)    | NR                                                                                        | NR                                                                     | Critically Low                     |



| Author, year            | Intervention type (N studies)                                                                                                                                                                                                          | Comparator (N studies)                                                   | Search dates | N studies included | Study design included (N studies)                      | N patients included (% F) | Diagnoses (N of studies)                                                                                        | Population age (mean, range) | Ethnicity (N,%) | Countries covered (N studies)                    | Quality appraisal rating (AMSTAR2) |
|-------------------------|----------------------------------------------------------------------------------------------------------------------------------------------------------------------------------------------------------------------------------------|--------------------------------------------------------------------------|--------------|--------------------|--------------------------------------------------------|---------------------------|-----------------------------------------------------------------------------------------------------------------|------------------------------|-----------------|--------------------------------------------------|------------------------------------|
|                         | Video-based problem-solving therapy (2)<br>Video-based therapy in multiple modalities (9)                                                                                                                                              |                                                                          |              |                    |                                                        |                           |                                                                                                                 |                              |                 |                                                  |                                    |
| <b>Berryhill, 2019b</b> | Video-based CBT (12)<br>Video-based behavioural activation (3)<br>Video-based ACT (1)<br>Video-based exposure therapy (2)<br>Video-based problem-solving therapy (1)<br>Video-based metacognitive therapy (1)<br>Multiple modality (1) | Face-to-face psychotherapy (K=20)<br>No control (K=1)                    | 1991-2017    | 21                 | RCT (6)<br>Quasi-experimental (4)<br>Uncontrolled (11) | NR                        | Depression (2)<br>PTSD (7)<br>Anxiety disorder (i.e, PD, GAD, social phobia; 5)<br>Depression/mood disorder (7) | NR (mean range: 8-62)        | NR              | USA (10)<br>Australia (6)<br>Canada (5)          | Critically low                     |
| <b>Bolton, 2015</b>     | Internet based CBT with therapist support via telephone calls, introductory F2F meetings, or emails (6)<br>Video-based CBT (5)                                                                                                         | F2F (5),<br>Supportive counselling (1), wait list (1), no comparator (4) | 1970-2014    | 11                 | RCT (4)<br>Non-randomised (7)                          | 472 (NR)                  | PTSD (11)                                                                                                       | 40, range 18-68              | NR              | USA (6)<br>Australia (3)<br>Canada (1)<br>UK (1) | Critically low                     |

It is made available under a [CC-BY-ND 4.0 International license](https://creativecommons.org/licenses/by-nd/4.0/).

| Author, year             | Intervention type (N studies)                                                         | Comparator (N studies)                                                                                                     | Search dates        | N studies included | Study design included (N studies)                                                                                                        | N patients included (% F)                                             | Diagnoses (N of studies)                                                                                                                                                                                                             | Population age (mean, range)                                                                   | Ethnicity (N,%) | Countries covered (N studies)                                                                               | Quality appraisal rating (AMSTAR2) |
|--------------------------|---------------------------------------------------------------------------------------|----------------------------------------------------------------------------------------------------------------------------|---------------------|--------------------|------------------------------------------------------------------------------------------------------------------------------------------|-----------------------------------------------------------------------|--------------------------------------------------------------------------------------------------------------------------------------------------------------------------------------------------------------------------------------|------------------------------------------------------------------------------------------------|-----------------|-------------------------------------------------------------------------------------------------------------|------------------------------------|
| <b>Christensen, 2019</b> | Video consultations and telepsychiatry (21)                                           | F2F (11), no control (10)                                                                                                  | Jan 2000 - Dec 2017 | 21                 | RCT (7)<br>Surveys (3)<br>Intervention study (6)<br>Evaluation using qualitative and quantitative methods (1)<br>Qualitative studies (4) | 2525 (NR)                                                             | Depression (6)<br>Various diagnoses (15)                                                                                                                                                                                             | NR                                                                                             | NR              | USA (12)<br>Canada (5)<br>Spain (1)<br>Australia (1)<br>Hong Kong (1)<br>Germany (1)                        | Low                                |
| <b>Coughtrey, 2018</b>   | CBT (12)<br>Exposure Response Prevention Therapy (ERPT; 1)<br>Behavioural Therapy (1) | F2F exposure response therapy (1)<br>Telephone emotion focused therapy (1)<br>TAU (5)<br>Waitlist (3)<br>No comparator (4) | Jan 1991 - May 2016 | 14                 | RCT (9)<br>Uncontrolled design (3)<br>Quasi-experimental (2)                                                                             | 750 (NR)                                                              | Depression (10; 5 with physical comorbidities)<br>OCD (2)<br>Anxiety disorders (2)                                                                                                                                                   | NR, range 32-66                                                                                | NR              | USA (11)<br>UK (2)<br>Canada (1)                                                                            | Low                                |
| <b>Drago, 2016</b>       | Videoconference (24)                                                                  | F2F (23)<br>No Comparator (1)                                                                                              | 2000 - 2015         | 26                 | RCT (26)                                                                                                                                 | Analysis of Assessment = 765 (NR)<br>Analysis of Efficacy = 2097 (NR) | Analysis of Assessment: Multiple Diagnoses (6)<br>Alzheimer's Disease (2)<br>Schizophrenia (3)<br>Autism (1).<br>Analysis of Efficacy: Multiple Diagnoses (2)<br>PTSD (3)<br>ADHD (1)<br>Major Depression (6)<br>Alzheimer's Disease | Analysis of Assessment: NR, mean range 9 - 68.<br>Analysis of Efficacy: NR, mean range 9 - 65. | NR              | USA (17)<br>Canada (2)<br>Japan (2)<br>China (1)<br>New Zealand (1)<br>India (1)<br>Norway (1)<br>Spain (1) | Low                                |

It is made available under a [CC-BY-ND 4.0 International license](https://creativecommons.org/licenses/by-nd/4.0/).

| Author, year               | Intervention type (N studies)                                                                                                                                                                                                                                 | Comparator (N studies)                                                    | Search dates        | N studies included | Study design included (N studies)                                                                  | N patients included (% F)                              | Diagnoses (N of studies)                                                                                                                | Population age (mean, range)                      | Ethnicity (N,%)                | Countries covered (N studies)         | Quality appraisal rating (AMSTAR2) |
|----------------------------|---------------------------------------------------------------------------------------------------------------------------------------------------------------------------------------------------------------------------------------------------------------|---------------------------------------------------------------------------|---------------------|--------------------|----------------------------------------------------------------------------------------------------|--------------------------------------------------------|-----------------------------------------------------------------------------------------------------------------------------------------|---------------------------------------------------|--------------------------------|---------------------------------------|------------------------------------|
|                            |                                                                                                                                                                                                                                                               |                                                                           |                     |                    |                                                                                                    |                                                        | (1)<br>Eating Disorders<br>(1)                                                                                                          |                                                   |                                |                                       |                                    |
| <b>Garcia-Lizana, 2010</b> | Videoconference (10)                                                                                                                                                                                                                                          | NR                                                                        | 1997-2008           | 11                 | RCT (10)                                                                                           | 1054 (NR)                                              | Multiple diseases (4)<br>Depression (2)<br>Panic disorder (1)<br>PTSD (1)<br>Bulimia (1)<br>Schizophrenia (1)                           | NR                                                | NR                             | USA (6)<br>Canada (4)<br>Spain (1)    | Critical low                       |
| <b>Hassan, 2019</b>        | Not specified videoconferencing treatment intervention (2)<br>Video-based CBT (7)<br>video-based psychoeducation (2)<br>Video-based relapse prevention (1)<br>Video-based treatment management (1)<br>video-based evaluation of competency to stand trial (1) | F2F (14)                                                                  | 2000 - 2017         | 14                 | RCT (14)                                                                                           | 1714 (NR)                                              | Multiple (4)<br>Depression (5)<br>Panic Disorder (1)<br>PTSD (1)<br>Schizophrenia (1)<br>Bulimia Nervosa (1)<br>Mental Incompetency (1) | NR                                                | NR                             | Canada (5)<br>USA (8)<br>Spain (1)    | Critical low                       |
| <b>Lin, 2019</b>           | Psychotherapy (10)<br>Medication (3)                                                                                                                                                                                                                          | F2F<br>Psychotherapy (7)<br>Telephone (2)<br>TAU (1)<br>No comparator (3) | Jan 1998 - Oct 2018 | 13                 | RCT (7)<br>Quasi-Experimental (1)<br>Non-Randomised Pilot Studies (2)<br>Retrospective Studies (3) | 5546 (NR – substantial variability in gender reported) | Substance use Disorders (SUDs) including:<br>Alcohol (5)<br>Nicotine (3)<br>Opioid (5)                                                  | Mean age range 30.5 - 52 (1 study did not report) | NR (4)<br>Mostly Caucasian (9) | USA (10)<br>Canada (2)<br>Denmark (1) | Moderate                           |

| Author, year         | Intervention type (N studies)                                                                                                           | Comparator (N studies)                  | Search dates                       | N studies included | Study design included (N studies)                                                    | N patients included (% F) | Diagnoses (N of studies)                                                                                                                                                                                                                                                                          | Population age (mean, range) | Ethnicity (N,%) | Countries covered (N studies)                                                   | Quality appraisal rating (AMSTAR2) |
|----------------------|-----------------------------------------------------------------------------------------------------------------------------------------|-----------------------------------------|------------------------------------|--------------------|--------------------------------------------------------------------------------------|---------------------------|---------------------------------------------------------------------------------------------------------------------------------------------------------------------------------------------------------------------------------------------------------------------------------------------------|------------------------------|-----------------|---------------------------------------------------------------------------------|------------------------------------|
| <b>Lins, 2014</b>    | Telephone counselling (9)                                                                                                               | Friendly Calls (3)<br>TAU (6)           | 2000 - 2008                        | 12                 | RCT (Efficacy; 9)<br>Qualitative Study (Experience of Intervention; 3)               | NR                        | Depressive Symptoms (8)<br>Anxiety Symptoms (1)                                                                                                                                                                                                                                                   | NR, mean age range 60-66     | NR              | USA (8)<br>Germany (1)<br>Canada/USA (3)                                        | Moderate                           |
| <b>Muskens, 2014</b> | Telephone diagnostic interviewing (16)                                                                                                  | Traditional F2F Diagnostic Interviewing | NR (search took place in Jun 2012) | 16                 | NR                                                                                   | 1001 (NR)                 | Studies conducted diagnostic interviewing for a range of diagnoses including: Depression, Anxiety, Substance Misuse, Psychotic Disorders, Autism, PTSD, Manic Episodes/Mania, Panic Disorder, Social Phobia, Simple Phobia, Dysthymia. Included studies interviewed for between 1 - 21 disorders. | NR, 8.92-76.9                | NR              | USA (10)<br>UK (2)<br>Brazil (1)<br>Australia (1)<br>Canada (1)<br>Iran (1)     | Moderate                           |
| <b>Naslund, 2020</b> | Videoconference for psychiatric / neurological assessment / treatment (23)<br>Videotaping psychiatric histories (1)<br>Sending clinical | F2F (26)                                | 2000-2018                          | 26                 | RCT (11)<br>Observational study (10)<br>Pre-post study (3)<br>Quasi-experimental (2) | 17967 (NR)                | Depression (7)<br>General mental disorders (7)<br>Child mental health (4)<br>Geriatric mental health (4)<br>PTSD (2) Suicidal ideation (1)                                                                                                                                                        | NR                           | NR              | Canada (4)<br>Colombia (1)<br>USA (15)<br>Spain (1)<br>Germany (1)<br>Australia | Critically low                     |

It is made available under a [CC-BY-ND 4.0 International license](https://creativecommons.org/licenses/by-nd/4.0/).

| Author, year          | Intervention type (N studies)                                                                                    | Comparator (N studies)                                                                                             | Search dates                       | N studies included | Study design included (N studies)                                            | N patients included (% F) | Diagnoses (N of studies)                                                                                                                                                       | Population age (mean, range) | Ethnicity (N,%) | Countries covered (N studies)                                                  | Quality appraisal rating (AMSTAR2) |
|-----------------------|------------------------------------------------------------------------------------------------------------------|--------------------------------------------------------------------------------------------------------------------|------------------------------------|--------------------|------------------------------------------------------------------------------|---------------------------|--------------------------------------------------------------------------------------------------------------------------------------------------------------------------------|------------------------------|-----------------|--------------------------------------------------------------------------------|------------------------------------|
|                       | information electronically to psychiatrist for diagnosis and treatment plan (1)<br>Therapy via text messages (1) |                                                                                                                    |                                    |                    |                                                                              |                           | Epilepsy (1)                                                                                                                                                                   |                              |                 | (2)<br>Israel (1)<br>Hong Kong (1)                                             |                                    |
| <b>Norwood, 2018</b>  | Video-based CBT (10)                                                                                             | F2F CBT (10)                                                                                                       | NR (search took place in Apr 2018) | 10                 | RCT (4)<br>Non-RCT (2)<br>Case Studies/Series (3)<br>Uncontrolled Trial (1). | 343 (NR)                  | Depression/Anxiety /Mood or Anxiety Disorder (3)<br>Bulimia Nervosa or EDNOS (1)<br>PTSD (2)<br>OCD (1)<br>Panic Disorder with Agoraphobia (1)<br>Social Anxiety (1)<br>NR (1) | NR                           | NR              | USA (6)<br>Canada (1)<br>France (1)<br>UK (1)<br>Australia (1)                 | Moderate                           |
| <b>Olthuis, 2016a</b> | Internet CBT with therapist email/telephone support (37)<br>Internet behavioural therapy with exposure (1)       | Waitlist/attentional control (20)<br>Face to face (7)<br>Other internet therapy (6)<br>Multiple control groups (5) | Up to Mar 2015                     | 30                 | RCT                                                                          | 218 (67.1%)               | Social phobia (11)<br>PD with or without agoraphobia (8)<br>GAD (5)<br>PTSD (2)<br>OCD (2)<br>Specific phobia (2)<br>Mixed anxiety (8)                                         | 37.3, NR                     | NR              | Sweden (18)<br>Australia (14)<br>Switzerland (3)<br>Netherlands (2)<br>USA (1) | Moderate                           |
| <b>Olthuis, 2016b</b> | ICBT (with therapist contact) or CBT by phone (19).                                                              | F2F (8)<br>Internet-based supportive counselling (1)<br>TAU (2)<br>Telephone (1)<br>Self-help                      | Up to 28 Jul 2016                  | 19                 | RCT                                                                          | 1491 (67.7%)              | PTSD (13)<br>Sub-clinical PTSD (6)                                                                                                                                             | NR                           | NR              | USA (13)<br>Sweden (3)<br>Germany (1)<br>Australia                             | Moderate                           |

It is made available under a [CC-BY-ND 4.0 International license](https://creativecommons.org/licenses/by-nd/4.0/).

| Author, year             | Intervention type (N studies)                                                                                                                                                                                                                                                                                                       | Comparator (N studies)       | Search dates | N studies included | Study design included (N studies)                       | N patients included (% F) | Diagnoses (N of studies) | Population age (mean, range) | Ethnicity (N,%) | Countries covered (N studies)                                                                          | Quality appraisal rating (AMSTAR2) |
|--------------------------|-------------------------------------------------------------------------------------------------------------------------------------------------------------------------------------------------------------------------------------------------------------------------------------------------------------------------------------|------------------------------|--------------|--------------------|---------------------------------------------------------|---------------------------|--------------------------|------------------------------|-----------------|--------------------------------------------------------------------------------------------------------|------------------------------------|
|                          |                                                                                                                                                                                                                                                                                                                                     | iCBT (1)<br>Waiting list (6) |              |                    |                                                         |                           |                          |                              |                 | (2)                                                                                                    |                                    |
| <b>Sansom-Daly, 2016</b> | NA (systematic review of guidelines)                                                                                                                                                                                                                                                                                                | NA                           | 2004 - 2014  | 20                 | NA                                                      | NA                        | NA                       | NA                           | NA              | USA (10)<br>Canada (5)<br>Australia (1)<br>UK (1)<br>Europe (1)<br>South Africa (1)<br>New Zealand (1) | Low                                |
| <b>Turgoose, 2018</b>    | Video-based exposure (10)<br>Video-based cognitive processing therapy (6)<br>Video-based CBT (5)<br>Mixed interventions (11)<br>Telephone mindfulness (1)<br>Video-based behavioural activation (2)<br>Video-based eye movement desensitisation and reprocessing (1)<br>Video-based anger management (2)<br><br>Video-based general | F2F (41)                     | Up to 2018   | 41                 | NR. A mix of experimental and non-experimental designs. | 4130 (NR)                 | PTSD (41)                | NR                           | NR              | USA (40)<br>Canada (1)                                                                                 | Critical<br>Low                    |



| Author, year | Intervention type (N studies)                | Comparator (N studies) | Search dates | N studies included | Study design included (N studies) | N patients included (% F) | Diagnoses (N of studies) | Population age (mean, range) | Ethnicity (N,%) | Countries covered (N studies) | Quality appraisal rating (AMSTAR2) |
|--------------|----------------------------------------------|------------------------|--------------|--------------------|-----------------------------------|---------------------------|--------------------------|------------------------------|-----------------|-------------------------------|------------------------------------|
|              | coping and psychoeducation interventions (3) |                        |              |                    |                                   |                           |                          |                              |                 |                               |                                    |

*F2F: Face-to-face; TAU: Treatment as usual; NR: not reported; NA: not applicable; RCT: randomised controlled trial; EDNOS: eating disorder not otherwise specified; PTSD: post-traumatic stress disorder; OCD: obsessive-compulsive disorder; PD: panic disorder; GAD: generalised anxiety disorder*

**Table 2: Clinical effectiveness outcomes**

| Main diagnosis | Study                  | Intervention                                                                                                                                                                                                                                         | Comparator                                                     | Results                                                                                                                                                                                                                                                                                                                                                                                                                                                                                                                                                         | Data                                                                                       |
|----------------|------------------------|------------------------------------------------------------------------------------------------------------------------------------------------------------------------------------------------------------------------------------------------------|----------------------------------------------------------------|-----------------------------------------------------------------------------------------------------------------------------------------------------------------------------------------------------------------------------------------------------------------------------------------------------------------------------------------------------------------------------------------------------------------------------------------------------------------------------------------------------------------------------------------------------------------|--------------------------------------------------------------------------------------------|
| Anxiety        | <i>Berryhill 2019b</i> | Video-based CBT (K=12)<br>Video-based behavioural activation (K=3)<br>Video-based ACT (K=1)<br>Video-based exposure therapy (K=2)<br>Video-based problem-solving therapy (K=1)<br>Video-based metacognitive therapy (K=1)<br>Multiple modality (K=1) | Face-to-face psychotherapy (K=20)<br>No control (K=1)          | Fourteen of 21 studies found statistically significant improvement on validated anxiety measures when videoconferencing psychological therapy was involved. Eleven studies reported clinically significant improvements among participants. Seven out of ten controlled study designs compared face-to-face and videoconferencing psychological therapy and found no statistical difference between them.                                                                                                                                                       | No combined data available                                                                 |
|                | <i>Coughtrey 2018</i>  | Telephone-based CBT (K=2)<br>Telephone-based exposure response prevention therapy (K=1)<br>Telephone based behavioural therapy (K=1)                                                                                                                 | Face-to-face exposure response therapy (K=1)<br>Waitlist (K=3) | All three RCTs on anxiety reported significant reductions in anxiety symptoms following telephone delivered intervention. (OCD: comparable reductions to face-to-face treatment, maintained over 6 month follow-up, Panic disorder: significant reductions in panic and gains maintained over three month follow up, transdiagnostic intervention: significant reductions in anxiety sensitivity, panic, social phobia and PTSD) one quasi-experimental study found significant reductions in OCD symptoms compared to controls maintained at 12 week follow up | RCTs: Cohens d range from 0.34-1.07 (median=0.69) K=2<br>Uncontrolled: Cohens d=1.07 (K=1) |

|             |                                 |                                                                                                                                                                                                                                                                                                                                                                            |                                                                                                                            |                                                                                                                                                                                                                                                                                                                                                                                                                                                                                                                                                                                                                                                                                                                                                                                                                                                                                                                                                                                                                                                         |                                                                                                                                                                                                                                                                                                                       |
|-------------|---------------------------------|----------------------------------------------------------------------------------------------------------------------------------------------------------------------------------------------------------------------------------------------------------------------------------------------------------------------------------------------------------------------------|----------------------------------------------------------------------------------------------------------------------------|---------------------------------------------------------------------------------------------------------------------------------------------------------------------------------------------------------------------------------------------------------------------------------------------------------------------------------------------------------------------------------------------------------------------------------------------------------------------------------------------------------------------------------------------------------------------------------------------------------------------------------------------------------------------------------------------------------------------------------------------------------------------------------------------------------------------------------------------------------------------------------------------------------------------------------------------------------------------------------------------------------------------------------------------------------|-----------------------------------------------------------------------------------------------------------------------------------------------------------------------------------------------------------------------------------------------------------------------------------------------------------------------|
|             | <i>Olthuis 2016a</i>            | Internet CBT with therapist email/telephone support (K=37)<br>Internet behavioural therapy with exposure (K=1)                                                                                                                                                                                                                                                             | Waitlist/attentional control (K=20)<br>Face to face (K=7)<br>Other internet therapy (K=6)<br>Multiple control groups (K=5) | <p><i>vs control</i><br/>Therapist-supported iCBT showed significantly larger improvements in anxiety (K=12), disorder specific anxiety symptom severity (K=30) and general anxiety symptom severity (K=19) at post treatment compared to waiting list, attentional control, information only or online discussion group only controls.</p> <p><i>vs unguided iCBT</i><br/>Therapist-supported iCBT showed no difference in improvements in anxiety at post treatment (K=1), disorder specific anxiety symptom severity at post treatment (K=5) and general anxiety symptom severity (K=2) at post treatment compared to unguided self-help iCBT.</p> <p><i>vs face-to-face</i><br/>Therapist-supported iCBT showed no difference in improvements in anxiety at post treatment (K=4) and 6-12 month follow up (K=3), disorder specific anxiety symptom severity at post treatment (K=7) and 6-12 month follow up (K=6) and general anxiety symptom severity (K=6) at post treatment and at 6-12 month follow up (K=5) compared to face-to-face CBT.</p> | <p><b>Waitlist, attentional control, information only or online discussion group only controls at post treatment:</b><br/>SMD: -1.06 (95% CI: -1.29, -0.82) p&lt;.0001</p> <p><b>Face-to-face CBT at post treatment:</b><br/>SMD: 0.06 (95% CI: -0.25, 0.37) p=0.36 (no difference between iCBT and face-to-face)</p> |
| <b>PTSD</b> | <i>Turgoose 2018 [veterans]</i> | Video-based exposure (K=10)<br>Video-based cognitive processing therapy (K=6)<br>Video-based CBT (K=5)<br>Mixed interventions (K=11)<br>Telephone mindfulness (K=1)<br>Video-based behavioural activation (K=2)<br>Video-based eye movement desensitisation and reprocessing (K=1)<br>Video-based anger management (K=2)<br>Video-based general coping and psychoeducation | Face-to-face (K=41)                                                                                                        | Eighteen studies looked at the clinical effectiveness of tele-therapy interventions. All of these studies reported that tele-therapy was associated with significant reductions in PTSD symptoms, regardless of the type of intervention used, except one study that only measured anger in veterans with PTSD. Of those studies that used follow-up measures, all but one found these changes to be present at three or six months following treatment. Twelve of the 18 studies compared tele-therapy to in-person interventions. Nine concluded that tele-therapy was as effective as in person therapy. Two suggested in-person therapy produced significantly greater reductions in PTSD symptoms (though neither was randomised), and one study found that tele-therapy was more effective than in person.                                                                                                                                                                                                                                        | No combined data available                                                                                                                                                                                                                                                                                            |

|                      |                                                                                                                                                                                                                                                                                       |                                                                                                                                                                                 |                                                                                                                                                                                                                                                                                                                                                                                                                                                                                                                                                                                                                                                                                                                                                                                                                                                                                                                                                                                                                                                                                                                                    |                                                                                                                                                                                                                                                                                                                                                                                                                                                                                                                                                                                                                                                                                                                                                                                                                                                             |  |
|----------------------|---------------------------------------------------------------------------------------------------------------------------------------------------------------------------------------------------------------------------------------------------------------------------------------|---------------------------------------------------------------------------------------------------------------------------------------------------------------------------------|------------------------------------------------------------------------------------------------------------------------------------------------------------------------------------------------------------------------------------------------------------------------------------------------------------------------------------------------------------------------------------------------------------------------------------------------------------------------------------------------------------------------------------------------------------------------------------------------------------------------------------------------------------------------------------------------------------------------------------------------------------------------------------------------------------------------------------------------------------------------------------------------------------------------------------------------------------------------------------------------------------------------------------------------------------------------------------------------------------------------------------|-------------------------------------------------------------------------------------------------------------------------------------------------------------------------------------------------------------------------------------------------------------------------------------------------------------------------------------------------------------------------------------------------------------------------------------------------------------------------------------------------------------------------------------------------------------------------------------------------------------------------------------------------------------------------------------------------------------------------------------------------------------------------------------------------------------------------------------------------------------|--|
|                      |                                                                                                                                                                                                                                                                                       | interventions (K=3)                                                                                                                                                             |                                                                                                                                                                                                                                                                                                                                                                                                                                                                                                                                                                                                                                                                                                                                                                                                                                                                                                                                                                                                                                                                                                                                    |                                                                                                                                                                                                                                                                                                                                                                                                                                                                                                                                                                                                                                                                                                                                                                                                                                                             |  |
| <i>Olthuis 2016b</i> | <p>Video-based CBT (K=3)<br/> Video-based cognitive processing therapy (K=3)<br/> Internet CBT with therapist email/telephone support (K=9)<br/> Video-based prolonged exposure (K=2)<br/> Telephone mindfulness (K=1)<br/> Video-based behavioural activation and exposure (K=1)</p> | <p>Face-to-face (K=8)<br/> Internet-based supportive counselling (K=1)<br/> Treatment as usual (K=2)<br/> Telephone (K=1)<br/> Self-help iCBT (K=1)<br/> Waiting list (K=6)</p> | <p>Overall, Telehealth interventions showed significant improvement in PTSD symptoms post intervention (K=18), at 3-6 month follow up (K=11) and at 7-12 month follow up (K=3).</p> <p><b>Videoconferencing:</b><br/> Nine studies examined videoconferencing interventions for PTSD. Results showed significant improvement in PTSD symptoms at post intervention. There was no difference in improvements in PTSD symptoms between telehealth and face-to-face interventions at post treatment (K=7), however, face-to-face interventions showed significantly greater improvement at 3-6 month follow up (K=5).</p> <p><b>Internet delivered with telephone or email support</b><br/> Eight studies examined internet delivered interventions with telephone or email support. Results showed significant improvements in PTSD symptoms at post intervention. Furthermore, telehealth interventions were found to show significantly greater improvement in PTSD symptoms compared to waitlist controls (K=6). There was no data comparing these interventions to face-to-face treatments. No follow up data was available.</p> | <p><b>Total</b><br/> <i>Within group</i><br/> pre-post intervention: g=0.81 (95% CI: 0.65, 0.97) K=18 [favours telehealth]<br/> pre intervention to 3-6 month follow up: g = 0.78, (95% CI 0.59, 0.97), K=11 [favours telehealth]<br/> pre intervention to 7-12 month follow up: g = 0.75, (95% CI 0.25, 1.26) K=3 [favours telehealth]<br/> <i>Between group</i><br/> compared to waitlist control post intervention: g=0.6 (95% CI: 0.51, 0.86), K=6 [favours telehealth]<br/> compared to face-to-face treatment for PTSD post intervention: g= -0.05 (95% CI: 0.31, 0.20) K=7 [no difference]<br/> compared to face-to-face treatment for PTSD 3-6 month follow up: g= -0.25 (95% CI: -0.44, -0.07) K=5 [favours face-to-face]</p> <p><b>Videoconferencing</b><br/> <i>Within group</i><br/> pre-post intervention: g=0.71 (95% CI: 0.47, 0.96) K=8</p> |  |

|                    |                                                                                                                                                     |                                                                                                           |                                                                                                                                                                                                                                                                                                                                                                                                                                                                                                                                                                                                                                                                                                                                                                                                                                                                                                                                                                                                                                                |                                                                                                                                                                                                                                                                                                                                                                                                                                                                                                                                                                                                                                                                                                                                                                                |
|--------------------|-----------------------------------------------------------------------------------------------------------------------------------------------------|-----------------------------------------------------------------------------------------------------------|------------------------------------------------------------------------------------------------------------------------------------------------------------------------------------------------------------------------------------------------------------------------------------------------------------------------------------------------------------------------------------------------------------------------------------------------------------------------------------------------------------------------------------------------------------------------------------------------------------------------------------------------------------------------------------------------------------------------------------------------------------------------------------------------------------------------------------------------------------------------------------------------------------------------------------------------------------------------------------------------------------------------------------------------|--------------------------------------------------------------------------------------------------------------------------------------------------------------------------------------------------------------------------------------------------------------------------------------------------------------------------------------------------------------------------------------------------------------------------------------------------------------------------------------------------------------------------------------------------------------------------------------------------------------------------------------------------------------------------------------------------------------------------------------------------------------------------------|
|                    |                                                                                                                                                     |                                                                                                           |                                                                                                                                                                                                                                                                                                                                                                                                                                                                                                                                                                                                                                                                                                                                                                                                                                                                                                                                                                                                                                                | <p>[favours telehealth]<br/> <i>Between group</i><br/>         compared to waitlist control post intervention: No data<br/>         compared to face-to-face treatment for PTSD post intervention: <math>g = -0.05</math> (95% CI: -0.31, 0.20) <math>K=7</math> [no difference]</p> <p><b>Internet Interventions with telephone or email support</b><br/> <i>Within group</i><br/>         pre-post intervention: <math>g=0.94</math> (95% CI: 0.69, 1.20) <math>K=8</math><br/>         [favours telehealth]<br/> <i>Between group</i><br/>         compared to waitlist control post intervention: <math>g=0.73</math> (95% CI: 0.56, 0.91) <math>K=5</math> [favours telehealth]<br/>         compared to face-to-face treatment for PTSD post intervention: [no data]</p> |
| <i>Bolton 2015</i> | Internet based CBT with therapist support via telephone calls, introductory face-to-face meetings, or emails ( $K=6$ )<br>Video-based CBT ( $K=5$ ) | Face-to-face ( $K=5$ )<br>Supportive counselling ( $K=1$ )<br>Wait list ( $K=1$ )<br>No control ( $K=4$ ) | <p><b>Therapist assisted internet programs</b><br/>         Statistically significant reductions in the severity of depression and anxiety symptoms (including PTSD) were associated with therapist assisted internet programs in five studies, including significant large reductions in fear reactions, suicidal ideation, social functioning and insomnia. Treatment effects 1 to 6 months post-telepsychology were mixed, with both deterioration and continued improvement found in psychological functioning. This included an increased risk of alcohol consumption over time but also a decline in PTSD and depression symptoms in participants using internet programs.</p> <p><b>Videoconferencing</b><br/>         Video based interventions also produced short term reductions in affective symptoms, however, face-to-face therapy demonstrated slightly higher treatment gains. The longer-term effectiveness of videoconferencing was reported in only two studies which showed non-significant effect sizes at follow-up.</p> | No useful synthesis of data                                                                                                                                                                                                                                                                                                                                                                                                                                                                                                                                                                                                                                                                                                                                                    |

|                   |                                       |                                                                                                                                                                                                                                                                                                      |                                                                                           |                                                                                                                                                                                                                                                                                                                                                                                                                                                                                                                                                                                                                                                                                                                                                                                                                                                                                                                                                                                                                                                                                                                                                                                                                                                                                               |                            |
|-------------------|---------------------------------------|------------------------------------------------------------------------------------------------------------------------------------------------------------------------------------------------------------------------------------------------------------------------------------------------------|-------------------------------------------------------------------------------------------|-----------------------------------------------------------------------------------------------------------------------------------------------------------------------------------------------------------------------------------------------------------------------------------------------------------------------------------------------------------------------------------------------------------------------------------------------------------------------------------------------------------------------------------------------------------------------------------------------------------------------------------------------------------------------------------------------------------------------------------------------------------------------------------------------------------------------------------------------------------------------------------------------------------------------------------------------------------------------------------------------------------------------------------------------------------------------------------------------------------------------------------------------------------------------------------------------------------------------------------------------------------------------------------------------|----------------------------|
| <b>Depression</b> | <i>Harerimana 2019 [Older adults]</i> | Telephone based (K=3)<br>Video-based (K=2)<br>Web-Based (K=1)                                                                                                                                                                                                                                        | Waiting list (K NR)<br>treatment as usual (K NR)                                          | <p><b>Telephone:</b><br/>Three studies examined a telephone-based intervention. One study found that a home electronic messaging service to evaluate response and symptoms reduced emergency room and hospital visits. Another found that older adult veterans given a combined telephone-based psychotherapy and long-term illness management intervention showed significant reductions in depression compared with usual care. However, a third study found that adding tele-coaching to a web intervention did not significantly improve symptoms compared to providing only the web intervention.</p> <p><b>Videoconferencing:</b><br/>Two studies examined skype-based videoconferencing interventions, with inconsistent results. One study found that depression scores improved significantly from baseline but got worse at the 2 month follow up. Another found that the face-to-face and skype based intervention were not significantly different at post intervention and shorter follow ups, but that at 36 months the telehealth intervention showed significantly larger improvements in symptoms.</p> <p><b>Web-based CBT:</b><br/>One web-based CBT intervention was effective at reducing symptoms of depression (p=0.04), though there were high rates of attrition.</p> | No combined data available |
|                   | <i>Berryhill 2019a</i>                | Video-based CBT (K=12)<br>Video-based behavioural activation (K=5)<br>Video-based acceptance and behavioural therapy (K=1)<br>Video-based exposure (K=3)<br>Video-based metacognitive therapy (K=1)<br>Video-based problem solving therapy (K=2)<br>Video-based therapy in multiple modalities (K=9) | Face-to-face psychotherapy (K=16)<br>Face-to-face or telephone (K=2)<br>No control (K=15) | Twenty two of 33 studies included reported statistically significant reductions in depressive symptoms following videoconference-based psychotherapy. Most controlled studies reported inconsistent results when comparing face-to-face and video-based psychotherapy.                                                                                                                                                                                                                                                                                                                                                                                                                                                                                                                                                                                                                                                                                                                                                                                                                                                                                                                                                                                                                        | No combined data available |



|                                                                 |                                                      |                                                                                                                                                                                                                                                                                       |                                                                                                              |                                                                                                                                                                                                                                                                                                                                                                                                                                                                                                                                                                                                                                                                                                                                                                                                                                                                                        |                                                                                                                                                             |
|-----------------------------------------------------------------|------------------------------------------------------|---------------------------------------------------------------------------------------------------------------------------------------------------------------------------------------------------------------------------------------------------------------------------------------|--------------------------------------------------------------------------------------------------------------|----------------------------------------------------------------------------------------------------------------------------------------------------------------------------------------------------------------------------------------------------------------------------------------------------------------------------------------------------------------------------------------------------------------------------------------------------------------------------------------------------------------------------------------------------------------------------------------------------------------------------------------------------------------------------------------------------------------------------------------------------------------------------------------------------------------------------------------------------------------------------------------|-------------------------------------------------------------------------------------------------------------------------------------------------------------|
|                                                                 | <i>Coughtrey 2018</i>                                | Telephone-based CBT (K=10)                                                                                                                                                                                                                                                            | Telephone emotion focused therapy (K=1)<br>Treatment as usual (K=5)<br>No control (K=4)                      | 5/6 RCTS on depression reported significant reductions in depression symptoms following telephone delivered CBT (K=3) or IPT (K=2). these studies included people with recurrent depression (K=1), HIV (K=1), multiple sclerosis (K=1) and people from rural Latino communities (K=1). Two RCTs reported follow up- only one of these found maintenance of reductions in depressive symptoms. One RCT found that symptoms of depression were not significantly reduced in veterans. One quasi-experimental study found significant reductions in depression following telephone delivered CBT, with similar patterns of change found in the comparison group. Three uncontrolled studies reported statistically significant reductions in depression following telephone delivered CBT, including people with Parkinson's disease (K=1), HIV (K=1) and veterans with depression (K=1). | RCTS: Cohens d range from 0.25-1.98 (median =0.58) K=5<br>Uncontrolled: Cohens d range from 1.13-1.90 (median=1.25) K=2                                     |
|                                                                 | <i>Dorstyn 2013 [Minority ethnicity communities]</i> | Telephone CBT (K=2)<br>Telephone supportive counselling (K=1)<br>Telephone structural ecosystems therapy (K=1)<br>Internet CBT with weekly individual sessions (K=2)<br>Internet tele-psychiatry (K=1)<br>Internet supportive counselling and personalized email correspondence (K=1) | Face-to-face (K=1)<br>Treatment as usual (K=3)<br>Minimal support control/waitlist (K=2)<br>No control (K=2) | Telephone and internet mediated services were associated with significant improvements in measures of depression, anxiety, quality of life and psychosocial functioning. The review also found that two studies demonstrated similar effects on depression ratings (CES-D) in telephone and face-to-face psychotherapy. Three studies reported longer term effects of tele-counselling, with conflicting findings.                                                                                                                                                                                                                                                                                                                                                                                                                                                                     | No combined data available                                                                                                                                  |
| <b>Carers of people with dementia (for depressive symptoms)</b> | <i>Lins 2014</i>                                     | Telephone counselling (K=9)                                                                                                                                                                                                                                                           | Friendly calls (K=3)<br>Treatment as usual (K=6)                                                             | Telephone counselling without any additional intervention showed significant reductions in depressive symptoms in 3 studies, however, two additional studies showed no differences between groups. A study of telephone counselling with video sessions showed reductions in depressive symptoms in the intervention group but these did not significantly differ from the control group. One study found that telephone counselling with video sessions and a work book showed significant reductions in depressive symptoms. Burden, distress, anxiety, quality of life, satisfaction and social support outcomes were inconsistent.                                                                                                                                                                                                                                                 | <b>Telephone counselling only:</b><br>Depressive symptoms: K=3, SMD=0.32 (95% CI: 0.01, 0.63) p=0.04*<br>Burden: K=4, SMD=0.45 (95% CI: -0.01, 0.90) p=0.05 |

|                                |                                          |                                                                                                                                                                                                                                                                           |                                                                                                      |                                                                                                                                                                                                                                                                                                                                                                                                                                                                                                                                                                                                                                                                                                                                                                                                                                                                                                  |                            |
|--------------------------------|------------------------------------------|---------------------------------------------------------------------------------------------------------------------------------------------------------------------------------------------------------------------------------------------------------------------------|------------------------------------------------------------------------------------------------------|--------------------------------------------------------------------------------------------------------------------------------------------------------------------------------------------------------------------------------------------------------------------------------------------------------------------------------------------------------------------------------------------------------------------------------------------------------------------------------------------------------------------------------------------------------------------------------------------------------------------------------------------------------------------------------------------------------------------------------------------------------------------------------------------------------------------------------------------------------------------------------------------------|----------------------------|
|                                |                                          |                                                                                                                                                                                                                                                                           |                                                                                                      | Results show that it is still unclear whether telephone counselling can reduce caregiver burden.                                                                                                                                                                                                                                                                                                                                                                                                                                                                                                                                                                                                                                                                                                                                                                                                 |                            |
| <b>Substance use Disorders</b> | <i>Lin 2019</i>                          | Video or telephone-based Psychotherapy (K=10)<br>telemedicine medication management (K=3) (patient presents at local clinic with nurse and are connected to a physician at a distant site via videoconference)                                                            | Face-to-face psychotherapy (K=7)<br>Telephone (K= 2)<br>Treatment as usual (K=1)<br>No control (K=3) | Tobacco:<br>Videoconferencing interventions were not significantly better than in-person (K=1) or telephone (K=2) conditions in terms of abstinence.<br>Alcohol:<br>No significant difference in alcohol use outcomes compared to usual treatment (K=1), but lower drop out reported in the telemedicine intervention (K=1)<br>Opioid:<br>No significant difference in abstinence between videoconference based psychotherapy and in person psychotherapy for methadone patients (K=2), and no difference in time to abstinence (K=1)<br><br>Notably, none of the included studies described a non-inferiority design that specifically assessed whether the intervention was not significantly worse than usual in-person delivered care.<br>Overall, most studies suggested telemedicine interventions were an effective alternative especially when access to treatment is otherwise limited. | No combined data available |
| <b>Non-specific</b>            | <i>Hassan 2019 [refugee populations]</i> | Not specified videoconferencing treatment intervention (K=2)<br>Video-based CBT (K=7)<br>video-based psychoeducation (K=2)<br>Video-based relapse prevention (K=1)<br>Video-based treatment management (K=1)<br>video-based evaluation of competency to stand trial (K=1) | Face-to-face (K=14)                                                                                  | Five studies compared remote and face-to-face interventions in symptom reduction. Two found greater improvement in the remote intervention while three found no significant difference between the intervention and control groups.                                                                                                                                                                                                                                                                                                                                                                                                                                                                                                                                                                                                                                                              | No combined data available |

|  |                           |                                                                                                                                                                                                              |                                            |                                                                                                                                                                                                                                                                                                                 |                                                                               |
|--|---------------------------|--------------------------------------------------------------------------------------------------------------------------------------------------------------------------------------------------------------|--------------------------------------------|-----------------------------------------------------------------------------------------------------------------------------------------------------------------------------------------------------------------------------------------------------------------------------------------------------------------|-------------------------------------------------------------------------------|
|  | <i>Norwood 2018</i>       | Video-based CBT (K=10)                                                                                                                                                                                       | Face-to-face CBT (K=10)                    | All ten studies showed that video-based CBT improved symptom severity. Eight studies offered follow up data, and in all the post intervention improvement was maintained. Symptom reduction in video-based CBT was non-inferior to face-to-face across all six studies which offered a face-to-face comparison. | No combined data available                                                    |
|  | <i>Drago 2016</i>         | Videoconferencing K=24                                                                                                                                                                                       | Face-to-face (K=23)<br>No comparator (K=1) | Fourteen RCTs focused on efficacy of remote psychiatric counselling. There was no difference between treatment in remote and face-to-face settings.                                                                                                                                                             | Videoconferencing vs face-to-face therapy:<br>SMD=-0.11 (95% CI: -0.41, 0.18) |
|  | <i>Garcia-Lizana 2010</i> | videoconferencing for diagnosis and follow-up (K= 3)<br>video-based evaluation of competency to stand trial (K=1)<br>non-specific video-based CBT (K=5)<br>video-based psychoeducation and counselling (K=1) | Face-to-face (K=10)                        | Across seven studies, there was no statistically significant difference between telepsychiatry and face-to-face interventions in symptom reduction. Across three studies, there was no statistically significant difference between telepsychiatry in quality of life improvements                              | No combined data available                                                    |

RCT: Randomized controlled trial. CBT: Cognitive behaviour therapy. SMD: Standardized mean difference. K: number of studies

**Table 3: Implementation outcomes**

| Outcome                                      | Study                           | Assessment/Treatment     | Main diagnosis | Intervention                                                                                                                                                                                                                                                                                                                                                                                   | Comparator                                  | Results                                                                                                                                                                                                                                                                                       |
|----------------------------------------------|---------------------------------|--------------------------|----------------|------------------------------------------------------------------------------------------------------------------------------------------------------------------------------------------------------------------------------------------------------------------------------------------------------------------------------------------------------------------------------------------------|---------------------------------------------|-----------------------------------------------------------------------------------------------------------------------------------------------------------------------------------------------------------------------------------------------------------------------------------------------|
| <b>Assessment comparability</b>              | <i>Drago 2016</i>               | Assessment and treatment | Multiple       | Videoconferencing<br>K=24                                                                                                                                                                                                                                                                                                                                                                      | Face-to-face (K=23)<br>No comparator (K=1)  | Assessment was found to be highly consistent between remote and face-to-face settings. Correlation coefficient=0.73 (95% CI: 0.63, 0.83)                                                                                                                                                      |
|                                              | <i>Muskens 2014</i>             | Assessment               | Multiple       | Telephone diagnostic interviewing (K=16)                                                                                                                                                                                                                                                                                                                                                       | Face-to-face diagnostic interviewing (K=16) | There were too few studies which were properly performed to draw conclusions regarding the comparability of telephone and face-to-face interviews for psychiatric morbidity. Telephone interviewing for research purposes in depression and anxiety may however be a proper and valid method. |
| <b>Fidelity and competence of therapists</b> | <i>Turgoose 2018 [veterans]</i> | Treatment                | PTSD           | Video-based exposure (K=10)<br>Video-based cognitive processing therapy (K=6)<br>Video-based CBT (K=5)<br>Mixed interventions (K=11)<br>Telephone mindfulness (K=1)<br>Video-based behavioural activation (K=2)<br>Video-based eye movement desensitisation and reprocessing (K=1)<br>Video-based anger management (K=2)<br>Video-based general coping and psychoeducation interventions (K=3) | Face-to-face (K=41)                         | High levels of fidelity and therapist competence (K=3), with no significant differences compared to face-to-face.                                                                                                                                                                             |

|                                          |                                         |                          |            |                                                                                                                                                                                                                                                                                       |                                                                                                              |                                                                                                                                                                              |
|------------------------------------------|-----------------------------------------|--------------------------|------------|---------------------------------------------------------------------------------------------------------------------------------------------------------------------------------------------------------------------------------------------------------------------------------------|--------------------------------------------------------------------------------------------------------------|------------------------------------------------------------------------------------------------------------------------------------------------------------------------------|
| <b>Patient adherence to intervention</b> | <i>Bolton 2015</i>                      | Treatment                | PTSD       | Internet based CBT with therapist support via telephone calls, introductory face-to-face meetings, or emails (K=6)<br>Video-based CBT (K=5)                                                                                                                                           | Face-to-face (K=5)<br>Supportive counselling (K=1)<br>Wait list (K=1)<br>No control (K=4)                    | Qualitative feedback revealed that comprehension of the therapy materials was high, with participants completing set homework tasks (K=5)                                    |
|                                          | <i>Dorstyn 2013 [Ethnic minorities]</i> | Treatment                | Depression | Telephone CBT (K=2)<br>Telephone supportive counselling (K=1)<br>Telephone structural ecosystems therapy (K=1)<br>Internet CBT with weekly individual sessions (K=2)<br>Internet tele-psychiatry (K=1)<br>Internet supportive counselling and personalized email correspondence (K=1) | Face-to-face (K=1)<br>Treatment as usual (K=3)<br>Minimal support control/waitlist (K=2)<br>No control (K=2) | Most studies reported good treatment adherence with rates of completion of 75-97%                                                                                            |
|                                          | <i>Garcia-Lizana 2010</i>               | Assessment and treatment | Multiple   | videoconferencing for diagnosis and follow-up (K= 3)<br>video-based evaluation of competency to stand trial (K=1)<br>non-specific video-based CBT (K=5)<br>video-based psychoeducation and counselling (K=1)                                                                          | Face-to-face (K=10)                                                                                          | Across two studies, mixed results were found for treatment adherence, with one study finding no difference and another reporting better adherence in the face-to-face group. |
| <b>Patient Attendance</b>                | <i>Dorstyn 2013 [Ethnic minorities]</i> | Treatment                | Depression | Telephone CBT (K=2)<br>Telephone supportive counselling (K=1)<br>Telephone structural ecosystems therapy (K=1)<br>Internet CBT with weekly individual sessions (K=2)<br>Internet tele-psychiatry (K=1)                                                                                | Face-to-face (K=1)<br>Treatment as usual (K=3)<br>Minimal support control/waitlist (K=2)<br>No control (K=2) | One study reported difficulty reaching participants by telephone resulting in fewer sessions completed                                                                       |

|                                        |           |                                                    |  |                                                                                                                                                                                                                                    |                                                                                                      |                                                                                                                                                                                                                                                                                                                                                                                                                                                                                                                                                                                                                                                                                                                                                          |
|----------------------------------------|-----------|----------------------------------------------------|--|------------------------------------------------------------------------------------------------------------------------------------------------------------------------------------------------------------------------------------|------------------------------------------------------------------------------------------------------|----------------------------------------------------------------------------------------------------------------------------------------------------------------------------------------------------------------------------------------------------------------------------------------------------------------------------------------------------------------------------------------------------------------------------------------------------------------------------------------------------------------------------------------------------------------------------------------------------------------------------------------------------------------------------------------------------------------------------------------------------------|
|                                        |           |                                                    |  | Internet supportive counselling and personalized email correspondence (K=1)                                                                                                                                                        |                                                                                                      |                                                                                                                                                                                                                                                                                                                                                                                                                                                                                                                                                                                                                                                                                                                                                          |
| <i>Christensen 2019 [Older adults]</i> | Treatment | Depression/Range of diagnoses including depression |  | Video consultations for tele-psychiatry (K=21)                                                                                                                                                                                     | F2F (11), no control (10)                                                                            | Video consultations increased access to care and removed barriers such as having to travel (K=4).                                                                                                                                                                                                                                                                                                                                                                                                                                                                                                                                                                                                                                                        |
| <i>Lin 2019</i>                        | Treatment | Substance use Disorders                            |  | Video or telephone-based Psychotherapy (K=10)<br>telemedicine medication management (K=3)<br>(patient presents at local clinic with nurse and are connected to a physician at a distant site via videoconference)                  | Face-to-face psychotherapy (K=7)<br>Telephone (K= 2)<br>Treatment as usual (K=1)<br>No control (K=3) | Most studies reported increased retention in telemedicine groups (K=4) however no difference in in number of sessions attended was sometimes reported (K=2)<br><br>One alcohol study reported lower drop out in the telemedicine group, and more patients in this group were still in treatment at 6 months and one year. Two Opioid studies found that videoconference interventions resulted in better retention of participants up to one year compared to those receiving in person care. Another opioid study found >50% retention at 12 weeks but did not have a comparison group. However, another two studies found no difference between videoconference delivered psychotherapy and in person psychotherapy in the number of sessions attended |
| <i>Turgoose 2018 [veterans]</i>        | Treatment | PTSD                                               |  | Video-based exposure (K=10)<br>Video-based cognitive processing therapy (K=6)<br>Video-based CBT (K=5)<br>Mixed interventions (K=11)<br>Telephone mindfulness (K=1)<br>Video-based behavioural activation (K=2)<br>Video-based eye | Face-to-face (K=41)                                                                                  | In the majority of cases there were no differences between tele-therapy and in-person treatments on drop out or attendance. There was some indication that tele-therapy may help to increase uptake.                                                                                                                                                                                                                                                                                                                                                                                                                                                                                                                                                     |



|               |                                 |           |      |                                                                                                                                                                                                                                                                                                                                                                                                                                       |                                                                                                              |                                                                                                                                                                                                                                                                                                                                    |
|---------------|---------------------------------|-----------|------|---------------------------------------------------------------------------------------------------------------------------------------------------------------------------------------------------------------------------------------------------------------------------------------------------------------------------------------------------------------------------------------------------------------------------------------|--------------------------------------------------------------------------------------------------------------|------------------------------------------------------------------------------------------------------------------------------------------------------------------------------------------------------------------------------------------------------------------------------------------------------------------------------------|
|               |                                 |           |      | <p>movement desensitisation and reprocessing (K=1)</p> <p>Video-based anger management (K=2)</p> <p>Video-based general coping and psychoeducation interventions (K=3)</p>                                                                                                                                                                                                                                                            |                                                                                                              |                                                                                                                                                                                                                                                                                                                                    |
| <b>Safety</b> | <i>Bolton 2015</i>              | Treatment | PTSD | <p>Internet based CBT with therapist support via telephone calls, introductory face-to-face meetings, or emails (K=6)</p> <p>Video-based CBT (K=5)</p>                                                                                                                                                                                                                                                                                | <p>Face-to-face (K=5)</p> <p>Supportive counselling (K=1)</p> <p>Wait list (K=1)</p> <p>No control (K=4)</p> | Client safety was deemed satisfactory                                                                                                                                                                                                                                                                                              |
|               | <i>Turgoose 2018 [veterans]</i> | Treatment | PTSD | <p>Video-based exposure (K=10)</p> <p>Video-based cognitive processing therapy (K=6)</p> <p>Video-based CBT (K=5)</p> <p>Mixed interventions (K=11)</p> <p>Telephone mindfulness (K=1)</p> <p>Video-based behavioural activation (K=2)</p> <p>Video-based eye movement desensitisation and reprocessing (K=1)</p> <p>Video-based anger management (K=2)</p> <p>Video-based general coping and psychoeducation interventions (K=3)</p> | Face-to-face (K=41)                                                                                          | There might be some occasions where veterans have concerns about exposure tasks due to the lack of physical presence of the therapist, however overall it was established that these can be used just as effectively remotely. If appropriate steps are taken to manage safety, episodes of acute suicidality can also be managed. |

|                               |                                        |           |                                                    |                                                                                                                                                                                                                                                                                                                                                                                                |                                                                                           |                                                                                                                                                                                                       |
|-------------------------------|----------------------------------------|-----------|----------------------------------------------------|------------------------------------------------------------------------------------------------------------------------------------------------------------------------------------------------------------------------------------------------------------------------------------------------------------------------------------------------------------------------------------------------|-------------------------------------------------------------------------------------------|-------------------------------------------------------------------------------------------------------------------------------------------------------------------------------------------------------|
| <b>Technical difficulties</b> | <i>Bolton 2015</i>                     | Treatment | PTSD                                               | Internet based CBT with therapist support via telephone calls, introductory face-to-face meetings, or emails (K=6)<br>Video-based CBT (K=5)                                                                                                                                                                                                                                                    | Face-to-face (K=5)<br>Supportive counselling (K=1)<br>Wait list (K=1)<br>No control (K=4) | Minimal technical difficulties were encountered (K=1)<br>participants reported that they would have preferred different forms of media, for example a mobile application, to supplement support (K=1) |
|                               | <i>Christensen 2019 [Older adults]</i> | Treatment | Depression/Range of diagnoses including depression | Video consultations for tele-psychiatry (K=21)                                                                                                                                                                                                                                                                                                                                                 | F2F (11), no control (10)                                                                 | Challenges such as mistrust in technology were reported frequently (K=4)                                                                                                                              |
|                               | <i>Turgoose 2018 [veterans]</i>        | Treatment | PTSD                                               | Video-based exposure (K=10)<br>Video-based cognitive processing therapy (K=6)<br>Video-based CBT (K=5)<br>Mixed interventions (K=11)<br>Telephone mindfulness (K=1)<br>Video-based behavioural activation (K=2)<br>Video-based eye movement desensitisation and reprocessing (K=1)<br>Video-based anger management (K=2)<br>Video-based general coping and psychoeducation interventions (K=3) | Face-to-face (K=41)                                                                       | Commonly reported technical difficulties were low image resolution on videoconferencing technology, not being able to connect, and audio delays.                                                      |

*RCT: Randomized controlled trial. CBT: Cognitive behaviour therapy. K: number of studies*

**Table 4: Acceptability outcomes**

| Outcome                       | Study                                    | Assessment/Treatment     | Main diagnosis | Intervention                                                                                                                                                                                                                                                                       | Comparator          | Results                                                                                                                                                  |
|-------------------------------|------------------------------------------|--------------------------|----------------|------------------------------------------------------------------------------------------------------------------------------------------------------------------------------------------------------------------------------------------------------------------------------------|---------------------|----------------------------------------------------------------------------------------------------------------------------------------------------------|
| <b>Clinician satisfaction</b> | <i>Garcia-Lizana 2010</i>                | Assessment and treatment | Multiple       | videoconferencing for diagnosis and follow-up (K= 3)<br>video-based evaluation of competency to stand trial (K=1)<br>non-specific video-based CBT (K=5)<br>video-based psychoeducation and counselling (K=1)                                                                       | Face-to-face (K=10) | The lowest level of satisfaction was found to be in the videoconferencing group in two studies which examined clinician satisfaction.                    |
|                               | <i>Hassan 2019 [Refugee populations]</i> | Assessment and treatment | Multiple       | Not specified<br>videoconferencing treatment intervention (K=2)<br>Video-based CBT (K=7)<br>video-based psychoeducation (K=2)<br>Video-based relapse prevention (K=1)<br>Video-based treatment management (K=1)<br>video-based evaluation of competency to stand trial (K=1)       | Face-to-face (K=14) | Clinicians tended to report higher satisfaction in the face-to-face interventions, though most reported good satisfaction with the videoconference group |
|                               | <i>Turgoose 2018 [veterans]</i>          | Treatment                | PTSD           | Video-based exposure (K=10)<br>Video-based cognitive processing therapy (K=6)<br>Video-based CBT (K=5)<br>Mixed interventions (K=11)<br>Telephone mindfulness (K=1)<br>Video-based behavioural activation (K=2)<br>Video-based eye movement desensitisation and reprocessing (K=1) | Face-to-face (K=41) | One study reported that clinicians delivering therapy found teletherapy acceptable, with no difference with in-person therapies                          |

|                             |                                        |                                                                  |                                                          |                                                                                                                                             |                                                                                           |                                                                                                                                                                                                                                                                                                                                    |
|-----------------------------|----------------------------------------|------------------------------------------------------------------|----------------------------------------------------------|---------------------------------------------------------------------------------------------------------------------------------------------|-------------------------------------------------------------------------------------------|------------------------------------------------------------------------------------------------------------------------------------------------------------------------------------------------------------------------------------------------------------------------------------------------------------------------------------|
|                             |                                        |                                                                  |                                                          | Video-based anger management (K=2)<br>Video-based general coping and psychoeducation interventions (K=3)                                    |                                                                                           |                                                                                                                                                                                                                                                                                                                                    |
|                             | <i>Harerimana 2019 [older adults]</i>  | Treatment                                                        | Depression                                               | Telephone based (K=6)<br>Video-based (K=2)<br>Web-Based (K=1)                                                                               | Waiting list (K NR)<br>treatment as usual (K NR)                                          | Healthcare providers have positive perceptions and notice practical benefits associated with the use of telehealth for delivery of community mental health care (K=1) However nurses of a telepsychiatry consultation generally did not rate it positively (K=1)                                                                   |
|                             | <i>Lins 2014</i>                       | Support for carers of people with dementia (depressive symptoms) | Carers of people with dementia (for depressive symptoms) | Telephone counselling (K=9, K=2 reporting implementation outcomes)                                                                          | Friendly calls (K=3)<br>Treatment as usual (K=6)                                          | Spatial distance could be a problem because counsellors cannot see the reactions of carers (K=1). Counsellors also expressed a need for a debriefing with colleagues after counselling sessions                                                                                                                                    |
| <b>Therapeutic alliance</b> | <i>Bolton 2015</i>                     | Treatment                                                        | PTSD                                                     | Internet based CBT with therapist support via telephone calls, introductory face-to-face meetings, or emails (K=6)<br>Video-based CBT (K=5) | Face-to-face (K=5)<br>Supportive counselling (K=1)<br>Wait list (K=1)<br>No control (K=4) | Good therapeutic alliance reported (K=5)                                                                                                                                                                                                                                                                                           |
|                             | <i>Christensen 2019 [Older adults]</i> | Treatment                                                        | Depression/Range of diagnoses including depression       | Video consultations for telepsychiatry (K=21)                                                                                               | F2F (11), no control (10)                                                                 | Video sessions were considered better than telephone sessions due to their similarity to face-to-face sessions (K=2), though in one study female patients found videoconferencing interventions more impersonal than face-to-face. One clinician reported reduced communication intensity due to less clear facial movements (K=1) |

|                     |                                                                  |                                                          |                                                                                                                                                                                                                   |                                                                                                     |                                                                                                                                                                                                                                                                                                                                                                                                                                                                                                                                                                                                                                                                                                                                                                    |
|---------------------|------------------------------------------------------------------|----------------------------------------------------------|-------------------------------------------------------------------------------------------------------------------------------------------------------------------------------------------------------------------|-----------------------------------------------------------------------------------------------------|--------------------------------------------------------------------------------------------------------------------------------------------------------------------------------------------------------------------------------------------------------------------------------------------------------------------------------------------------------------------------------------------------------------------------------------------------------------------------------------------------------------------------------------------------------------------------------------------------------------------------------------------------------------------------------------------------------------------------------------------------------------------|
| <i>Lin 2019</i>     | Treatment                                                        | Substance use Disorders                                  | Video or telephone-based Psychotherapy (K=10)<br>telemedicine medication management (K=3)<br>(patient presents at local clinic with nurse and are connected to a physician at a distant site via videoconference) | Face-to-face psychotherapy (K=7)<br>Telephone (K=2)<br>Treatment as usual (K=1)<br>No control (K=3) | Participant and therapist ratings of therapeutic alliance ratings were high in both videoconference and in person interventions. (K=1)                                                                                                                                                                                                                                                                                                                                                                                                                                                                                                                                                                                                                             |
| <i>Lins 2014</i>    | Support for carers of people with dementia (depressive symptoms) | Carers of people with dementia (for depressive symptoms) | Telephone counselling (K=9, K=2 reporting implementation outcomes)                                                                                                                                                | Friendly calls (K=3)<br>Treatment as usual (K=6)                                                    | Counsellors can feel frustrated and helpless during telephone counselling because it is relatively impersonal (K=1)                                                                                                                                                                                                                                                                                                                                                                                                                                                                                                                                                                                                                                                |
| <i>Norwood 2018</i> | Treatment                                                        | Multiple                                                 | Video-based CBT (K=10)                                                                                                                                                                                            | Face-to-face CBT (K=10)                                                                             | Six studies used a face-to-face condition as a control group, with four finding that therapeutic alliance was noninferior in the videoconferencing condition compare to face-to-face. The remaining two reported that alliance was higher in the face-to-face group, though one reported no difference in participant rated alliance, only significantly higher therapist rated alliance for the face-to-face group.<br><br>Standardized mean difference in alliance ratings = -0.30 (95% CI: -0.67, 0.07), p=0.11, K=4<br><br>The lower limit of the 95% CI fell outside the prespecified limit of noninferiority ( $\Delta = -0.50$ ), indicating that, with respect to working alliance, Videoconference interventions were inferior to face-to-face treatment. |

|                             |                                         |           |                                                    |                                                                                                                                                                                                                                                                                                                                                                                                |                                                                                                              |                                                                                                                                                                                                                                                                                                                                                                                                            |
|-----------------------------|-----------------------------------------|-----------|----------------------------------------------------|------------------------------------------------------------------------------------------------------------------------------------------------------------------------------------------------------------------------------------------------------------------------------------------------------------------------------------------------------------------------------------------------|--------------------------------------------------------------------------------------------------------------|------------------------------------------------------------------------------------------------------------------------------------------------------------------------------------------------------------------------------------------------------------------------------------------------------------------------------------------------------------------------------------------------------------|
|                             | <i>Turgoose 2018 [veterans]</i>         | Treatment | PTSD                                               | Video-based exposure (K=10)<br>Video-based cognitive processing therapy (K=6)<br>Video-based CBT (K=5)<br>Mixed interventions (K=11)<br>Telephone mindfulness (K=1)<br>Video-based behavioural activation (K=2)<br>Video-based eye movement desensitisation and reprocessing (K=1)<br>Video-based anger management (K=2)<br>Video-based general coping and psychoeducation interventions (K=3) | Face-to-face (K=41)                                                                                          | While most studies found that alliance was equivalent in teletherapy and in person conditions, some suggested that veterans may feel more comfortable talking to therapists face-to-face. Challenges in detecting body language were reported, but overall clinicians felt that teletherapy did not affect their ability to establish rapport.                                                             |
| <b>Patient satisfaction</b> | <i>Christensen 2019 [Older adults]</i>  | Treatment | Depression/Range of diagnoses including depression | Video consultations for telepsychiatry (K=21)                                                                                                                                                                                                                                                                                                                                                  | F2F (11), no control (10)                                                                                    | High levels of patient satisfaction and acceptability were frequently reported, and there were no significant differences between face-to-face and videoconferencing in RCT studies. Patients preferred the reduced waiting time (K=1). Some patients reported initial scepticism as a reason for preference of face-to-face interventions, however this usually dissipated with use of remote technology. |
|                             | <i>Dorstyn 2013 [Ethnic minorities]</i> | Treatment | Depression                                         | Telephone CBT (K=2)<br>Telephone supportive counselling (K=1)<br>Telephone structural ecosystems therapy (K=1)<br>Internet CBT with weekly individual sessions (K=2)<br>Internet telepsychiatry (K=1)<br>Internet supportive counselling and                                                                                                                                                   | Face-to-face (K=1)<br>Treatment as usual (K=3)<br>Minimal support control/waitlist (K=2)<br>No control (K=2) | Consistent patient satisfaction was reported                                                                                                                                                                                                                                                                                                                                                               |

|                                          |                          |                         |                                                                                                                                                                                                                                                                              |                                                                                                     |                                                                                                                                                                                                                                     |  |
|------------------------------------------|--------------------------|-------------------------|------------------------------------------------------------------------------------------------------------------------------------------------------------------------------------------------------------------------------------------------------------------------------|-----------------------------------------------------------------------------------------------------|-------------------------------------------------------------------------------------------------------------------------------------------------------------------------------------------------------------------------------------|--|
|                                          |                          |                         |                                                                                                                                                                                                                                                                              | personalized email correspondence (K=1)                                                             |                                                                                                                                                                                                                                     |  |
| <i>Garcia-Lizana 2010b</i>               | Assessment and treatment | Multiple                | videoconferencing for diagnosis and follow-up (K= 3)<br>video-based evaluation of competency to stand trial (K=1)<br>non-specific video-based CBT (K=5)<br>video-based psychoeducation and counselling (K=1)                                                                 | Face-to-face (K=10)                                                                                 | Patients generally appeared satisfied with the technology utilized and its quality (K=2). High satisfaction was reported in other studies though it is unclear if satisfaction was generated by the program or the technology (K=5) |  |
| <i>Hassan 2019 [Refugee populations]</i> | Assessment and treatment | Multiple                | Not specified<br>videoconferencing treatment intervention (K=2)<br>Video-based CBT (K=7)<br>video-based psychoeducation (K=2)<br>Video-based relapse prevention (K=1)<br>Video-based treatment management (K=1)<br>video-based evaluation of competency to stand trial (K=1) | Face-to-face (K=14)                                                                                 | Most studies reported high satisfaction with videoconference interventions (K=3) or no difference in satisfaction compared to face-to-face groups (K=3) however one study reported lower satisfaction compared to face-to-face.     |  |
| <i>Lin 2019</i>                          | Treatment                | Substance use Disorders | Video or telephone-based Psychotherapy (K=10)<br>telemedicine medication management (K=3)<br>(patient presents at local clinic with nurse and are connected to a physician at a distant site via videoconference)                                                            | Face-to-face psychotherapy (K=7)<br>Telephone (K=2)<br>Treatment as usual (K=1)<br>No control (K=3) | Satisfaction was generally quite high in videoconference interventions, and that participants would recommend the intervention to others.                                                                                           |  |



|                    |                                        |                                                                  |                                                          |                                                                                                                                                                                                                                                                                                                                                                                                |                                                                                                     |                                                                                                                                                                                                                                                              |
|--------------------|----------------------------------------|------------------------------------------------------------------|----------------------------------------------------------|------------------------------------------------------------------------------------------------------------------------------------------------------------------------------------------------------------------------------------------------------------------------------------------------------------------------------------------------------------------------------------------------|-----------------------------------------------------------------------------------------------------|--------------------------------------------------------------------------------------------------------------------------------------------------------------------------------------------------------------------------------------------------------------|
|                    | <i>Lins 2014</i>                       | Support for carers of people with dementia (depressive symptoms) | Carers of people with dementia (for depressive symptoms) | Telephone counselling (K=9, K=2 reporting implementation outcomes)                                                                                                                                                                                                                                                                                                                             | Friendly calls (K=3)<br>Treatment as usual (K=6)                                                    | Reservations expressed about getting advice from an unknown person (K=1)<br>Both studies reported that carers found the information given helpful and were grateful for it. One study found that telephone counselling helped alleviate loneliness in carers |
|                    | <i>Turgoose 2018 [veterans]</i>        | Treatment                                                        | PTSD                                                     | Video-based exposure (K=10)<br>Video-based cognitive processing therapy (K=6)<br>Video-based CBT (K=5)<br>Mixed interventions (K=11)<br>Telephone mindfulness (K=1)<br>Video-based behavioural activation (K=2)<br>Video-based eye movement desensitisation and reprocessing (K=1)<br>Video-based anger management (K=2)<br>Video-based general coping and psychoeducation interventions (K=3) | Face-to-face (K=41)                                                                                 | Patients found teletherapy and face-to-face treatments equally satisfactory-accepting the need for treatments to be in teletherapy form was shown to be important.                                                                                           |
| <b>Convenience</b> | <i>Christensen 2019 [Older adults]</i> | Treatment                                                        | Depression/Range of diagnoses including depression       | Video consultations for telepsychiatry (K=21)                                                                                                                                                                                                                                                                                                                                                  | F2F (11), no control (10)                                                                           | Patients reported that video consultations were more relaxing and it was convenient to stay at home (K=3)                                                                                                                                                    |
|                    | <i>Lin 2019</i>                        | Treatment                                                        | Substance use Disorders                                  | Video or telephone-based Psychotherapy (K=10)<br>telemedicine medication management (K=3)<br>(patient presents at local clinic with nurse and are connected to a physician at a distant site via videoconference)                                                                                                                                                                              | Face-to-face psychotherapy (K=7)<br>Telephone (K=2)<br>Treatment as usual (K=1)<br>No control (K=3) | Participants found the increased convenience important as they would have had difficulty obtaining the intervention without telemedicine (K=1).                                                                                                              |

|  |                  |                                                                  |                                                          |                                                                    |                                                  |                                                                                                                                                                      |
|--|------------------|------------------------------------------------------------------|----------------------------------------------------------|--------------------------------------------------------------------|--------------------------------------------------|----------------------------------------------------------------------------------------------------------------------------------------------------------------------|
|  | <i>Lins 2014</i> | Support for carers of people with dementia (depressive symptoms) | Carers of people with dementia (for depressive symptoms) | Telephone counselling (K=9, K=2 reporting implementation outcomes) | Friendly calls (K=3)<br>Treatment as usual (K=6) | Carers found telephone counselling good because it avoided the stress involved in coordinating an appointment. (K=1)<br>Needs for 24hr counsellor availability (K=1) |
|--|------------------|------------------------------------------------------------------|----------------------------------------------------------|--------------------------------------------------------------------|--------------------------------------------------|----------------------------------------------------------------------------------------------------------------------------------------------------------------------|

*RCT: Randomized controlled trial. CBT: Cognitive behaviour therapy. SMD: Standardized mean difference. K: number of studies*

Figure 1: Prisma Diagram

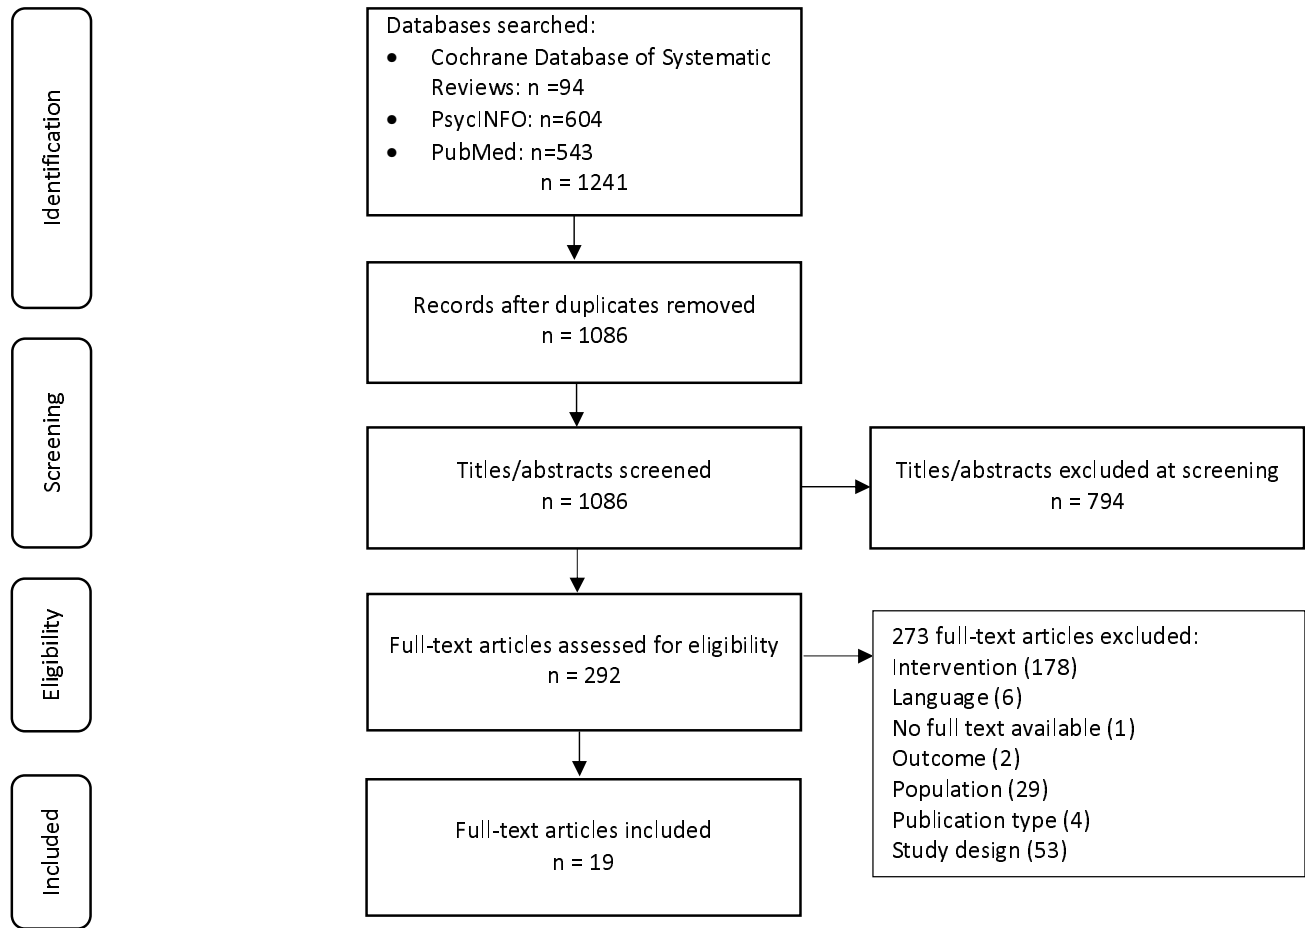

Source: https://medrxiv.org/content/10.1101/2020.11.30.20240721v1.full.pdf
